# Supplementary material for: New opportunities, new challenges: Harnessing Cuba’s advances in agroecology and sustainable agriculture in the context of changing relations with the United States
Source: Oxford University Press journal article supplement (doi:10.1525/elementa.337), 2018-01-01
Supplement: elementa-6-337-s1.pdf [file elementa-6-337-s1.pdf]

**Para Citar:** Fernandez, M., Williams, J., Figueroa, G., Graddy Lovelace, G., Machado, M., Vasquez, L., Perez, N., Casimiro, L., Romero, G. and Funes Aguilar, F., 2018. New opportunities, new challenges: Harnessing Cuba's advances in agroecology and sustainable agriculture in the context of changing relations with the United States. *Elem Sci Anth*, 6(1), p.76. DOI: <http://doi.org/10.1525/elementa.337>

## **Nuevas Oportunidades, Nuevos Retos: Potenciando los Avances de Cuba en la Agroecología y la Agricultura Sostenible en el Contexto de Cambios en las Relaciones con los Estados Unidos**

Margarita Fernández<sup>1\*</sup>, Justine Williams<sup>2</sup>, Galia Figueroa<sup>3</sup>, Garrett Graddy-Lovelace<sup>4</sup>, Mario Machado<sup>5</sup>, Luis Vázquez<sup>6</sup>, Nilda Pérez<sup>7</sup>, Leidy Casimiro<sup>8</sup>, Graciela Romero<sup>9</sup>, Fernando Funes Aguilar<sup>10</sup>

<sup>1</sup> Cuba-US Agroecology Network, Vermont Caribbean Institute, University of Vermont, USA

<sup>2</sup> Platform for Innovation and Dialogue with Cuba, Washington DC, USA

<sup>3</sup> Center for Development Research, University of Bonn, Germany

<sup>4</sup> American University, Washington DC, USA

<sup>5</sup> Clark University, Massachusetts, USA

<sup>6</sup> Asociación Cubana de Técnicos Agrícolas y Forestales (ACTAF), La Habana, Cuba

<sup>7</sup> Universidad Agraria de la Habana, La Habana, Cuba

<sup>8</sup> Finca del Medio, Sancti Spiritus, Cuba

<sup>9</sup> Coventry University, Coventry, England

<sup>10</sup> Estación Experimental de Pastos y Forrajes "Indio Hatuey", Matanzas, Cuba

\*autora de contacto: margarita@vtcaribbean.org

### **Resumen**

La transición agroecológica cubana es quizás tan ampliamente conocida como malentendida. Como respuesta a la crisis económica a principio de los 90, el sector agropecuario cubano se apartó en gran medida del modelo industrial de producción alimentaria que anteriormente había perseguido. La transición posterior hacia un modelo agroecológico ha sido un proceso dinámico y heterogéneo, que 1) ha convertido a Cuba en líder en el desarrollo de una agricultura sostenible a escala global y que, al mismo tiempo, 2) ha producido una variedad de desafíos inéditos para agricultores, decisores políticos, investigadores y académicos cubanos. Este artículo busca sintetizar y actualizar la literatura contemporánea sobre el sistema agrícola cubano, prestando atención tanto a los éxitos como a las debilidades de la agroecología en Cuba hasta la fecha. En particular, sitúa esta literatura a la par de los aportes de académicos, técnicos y agricultores, aportando una diversidad de datos, experiencias y perspectivas a la discusión, en un contexto cambiante tanto dentro de Cuba, como en las relaciones geopolíticas con los Estados Unidos. Partiendo del análisis de los procesos, tanto históricos como actuales, a través de los cuales la agroecología se ha enraizado en Cuba, este artículo muestra que, a pesar de su implementación desigual y aún no completa, la transición agroecológica sostenible en Cuba tiene un gran potencial por explotar. Si bien actualmente la agroecología cubana enfrenta la presión de la normalización de las relaciones Cuba-Estados Unidos, con implicaciones potencialmente profundas para la agricultura en ambos países, también puede beneficiarse de oportunidades cada vez más emergentes para la inversión, la colaboración y la solidaridad. En este artículo, proporcionamos una visión general de la

evolución del movimiento agroecológico cubano; analizamos el estado de la seguridad alimentaria y los retos de la soberanía alimentaria en la isla hoy; resumimos los cambios en la política Estados Unidos-Cuba desde diciembre del 2014 que pueden afectar al sector agroalimentario; y concluimos con recomendaciones para apoyar la agroecología (para la seguridad y soberanía alimentaria y la sustentabilidad) bajo esta nueva y cambiante relación.

## **1. Introducción**

Uno de los mayores desafíos que enfrentamos como comunidad global es alimentar de manera sostenible a una población en crecimiento, y al mismo tiempo, conservar los recursos naturales finitos de los que nuestra sociedad y economía dependen. A pesar de los aumentos masivos en la producción agropecuaria mundial alcanzados en el siglo pasado, alrededor de dos mil millones de personas pasan hambre en todo el mundo (Hickel, 2016). En la actualidad, la agricultura mundial produce alimentos suficientes para alimentar a 1.5 veces nuestra población de 7.5 mil millones de personas (FAO, et al. 2017), sin embargo, los debates sobre si el mejor enfoque para alimentar al mundo es el modelo agrícola industrial dominante o alternativas, como la agricultura orgánica o la agroecología, se centran con demasiada frecuencia en la cuestión de la producción. Aunque la producción insuficiente puede ser una barrera para alcanzar la seguridad alimentaria, el hambre es un problema multifacético que requiere abordar problemas estructurales de distribución, el desperdicio de alimentos, pobreza, poder y desigualdad (Sen, 1984; Lappe, et al. 1998; Pimbert, et al. 2001; Maxwell, 1996). Amplia evidencia muestra que el modelo agroalimentario industrial no ha sido capaz de alimentarnos adecuada y nutritivamente al tiempo que perpetúa un sistema que es ecológicamente destructivo, socioeconómicamente injusto, y políticamente poderoso (Pimbert, et al. 2001; Chappell y LaValle, 2011; Holt-Giménez y Altieri, 2013; McMichael, 2009). En adición, el 70% de los alimentos consumidos en el planeta es producido por pequeños agricultores que utilizan solamente el 20% de los recursos, lo que destaca la necesidad de invertir y apoyar ese sector (ETC, 2009).

En los últimos años, el concepto de agroecología ha ganado un espacio en los organismos de gobernanza internacional como paradigma agroalimentario que aborda de manera más efectiva los problemas de hambre, la pobreza y la desigualdad, al mismo tiempo que frena la pérdida de biodiversidad y provee mayor resiliencia al cambio climático (FAO, 2015; IAASTD, 2009; De Schutter, 2010). Esta aceptación proviene tanto de la creciente evidencia de que el modelo actual debe cambiar como de la implementación, defensa y promoción persistentes de este enfoque durante décadas por parte de agricultores, científicos y organizaciones no gubernamentales a nivel internacional. En términos sencillos, la agroecología es la “aplicación de los principios ecológicos al diseño y manejo de agroecosistemas a través de la integración de conocimientos tradicionales y científicos” (Altieri, 1995).

Sin embargo, la agroecología no es solamente una ciencia y una práctica en campo, sino también un movimiento social y político que busca transformar el modelo alimentario corporativo a través de la investigación, implementación y defensa de modelos socialmente justos, económicamente equitativos y ecológicamente resilientes (Wezel, et al. 2009; Francis, et al. 2003; Méndez, et al. 2015). La agroecología, término deliberadamente amplio, abarca conjuntos de prácticas, saberes y culturas agrarias ancestrales, tales como la agroforestería, la conservación de semillas y el uso de terrazas en contorno. También se refiere a una ciencia emergente, integradora y rigurosa dedicada a explorar, explicar y expandir ese

mundo de saberes agrícolas. Más que un simple conjunto de técnicas, la agroecología se ubica en el ámbito de los movimientos sociales que promueven y defienden esas prácticas, su patrimonio biocultural y su potencial político emancipatorio. La agroecología establece principios para identificar, seleccionar y cultivar los diseños y manejos que soportan la sustentabilidad a lo largo de los sistemas agroalimentarios.

A pesar de que haya sido marginalizado y descartado por las ciencias agronómicas convencionales y las políticas públicas durante décadas, los beneficios multifacéticos de la agroecología están ganando terreno y atención, incluso en la FAO, donde expertos, científicos y la sociedad civil se han reunido regularmente desde 2014 para avanzar en este trabajo (FAO, 2015; 2017). Mientras tanto, como diversos organismos e informes internacionales han reconocido y promovido los beneficios multifuncionales—y la urgencia—de la agroecología (IAASTD, 2009; UNCTAD, 2013; De Schutter, 2010; IPES, 2016), los objetivos de integración plantean cuestiones de cooptación, que son de particular preocupación si el concepto de agroecología es despojado de su contenido social y político y reducido a una ciencia técnica. Los agroecólogos avisan de una “agroecología-lite” (Holt-Giménez y Altieri, 2016) y los riesgos de dilución y el reduccionismo impulsados por la institucionalización (Giraldo y Rosset, 2017). Los esfuerzos de integrar la agroecología no deben ignorar la investigación y las experiencias con la masificación y el escalonamiento vertical y horizontal de la agroecología, incluyendo la experiencia cubana (Machín Sosa, et al. 2010; Rosset y Altieri, 2017; Wijeratna, 2018; Mier y Terán Giménez Cacho, et al. 2018; McCune, et al. 2017; Varghese y Hansen-Kuhn, 2015; Parmentier, 2014; Altieri y Nicholls, 2012). En general, la Declaración de Nyéléni de 2007 y la de 2015, son consideradas aún entre activistas de la soberanía alimentaria y académicos como la visión para la agroecología de base popular (Nyéléni, 2007; 2015).

Un hilo conductor de estas publicaciones y las reuniones regionales de la FAO ha sido un reconocimiento de la necesidad de más investigaciones sobre dónde y cómo se están llevando a cabo sistemas productivos agroecológicos y cuáles son sus desempeños. Con este fin, nuestro artículo pretende contribuir a esta discusión global y creciente sobre la agroecología, enfocándose en un modelo particularmente renombrado—y a menudo malentendido: la agricultura cubana. Indudablemente, Cuba pone en práctica muchos de los principios centrales de la agroecología, desde la producción con bajos insumos externos a los sistemas agrícolas diversificados, desde las metodologías horizontales a la orientación hacia la justicia social. La dimensión de movimiento social de la agroecología es particularmente fuerte en el contexto latinoamericano, de Nicaragua a Brasil, desde Guatemala a Colombia. Toledo y Barrera-Bassols (2017) documentan un mosaico de organizaciones de base y movimientos en el sur de México que están promoviendo e implementando la agroecología política. A lo largo del hemisferio, el caso cubano destaca como un extraordinario acontecimiento de reforma agraria revolucionaria, y continuidad, contra todas las probabilidades.

Cuba ha promovido e implementado la agroecología durante más de 20 años, como parte de su lucha por sostener la seguridad alimentaria nacional y la soberanía doméstica. Estas experiencias ofrecen lecciones importantes para otros agricultores, institutos de investigación, organizaciones no gubernamentales (ONG) y gobiernos que también trabajan en pro de la seguridad y soberanía alimentaria, la sostenibilidad y la estabilidad económica. La historia de la agroecología cubana es continua y múltiple; esta revisión de literatura recopila datos y análisis existentes sobre la complejidad de la transición agroecológica de Cuba, para contextualizarlos y examinar sus impactos y retos. Como retrato de un fenómeno dinámico, una revisión de este tipo es útil para agroecólogos, decisores de políticas públicas, la sociedad civil, y estudiosos de Cuba.

Este artículo será también de interés para los estudiosos del cambio agrario. Durante más de un siglo, académicos alrededor del mundo han debatido ‘la cuestión agraria’: ¿cómo el capitalismo captura, y, sin embargo, no logra capturar, la agricultura campesina? (Moyo, et al. 2013). El capitalismo atenta contra la agricultura de pequeña escala, buscando penetrar las economías y los paisajes agrarios para su acumulación, sin embargo, el mundo agrario elude ser capturado por las corporaciones, aun cuando lo mismo significa la auto-explotación. Cuba, particularmente en relación con los Estados Unidos, tipificó la cuestión agraria del siglo XX (Graddy-Lovelace, 2016) con la Revolución ostentando el dominio político (improbable) sobre todas las empresas agro-capitalistas norteamericanas de fruta, azúcar, ron y chocolate en la isla. Generaciones después, las relaciones agrícolas entre Cuba-Estados Unidos plantean otras ‘cuestiones agrarias’, como muestra este artículo. De hecho, el surgimiento y los retos de la agroecología cubana caracterizan la evolución de cuestión agraria en sí misma. Al inicio del siglo XXI, Cuba muestra cómo la agroecología sirve como una respuesta agraria (o como un campo de respuestas) a las preguntas de cómo alimentarnos frente a diversas presiones ecológicas y económicas. De esta manera, la agroecología, practicada, explorada y adaptada por los cubanos, sirve como modo de sobrevivir las crisis creadas por la agricultura industrial, tanto en su forma capitalista como comunista. Así pues, el estudio de la agroecología cubana, contextualizado adentro de las relaciones agrarias Estados Unidos-Cuba, contribuye a la larga e importante línea de investigación sobre crisis agraria, cambio y resiliencia.

Desde diciembre del 2014, Cuba y Estados Unidos han comenzado la normalización de las relaciones y nuevas posibilidades para intercambio y encuentro están emergiendo, aunque ya estas han sido limitadas por el enfoque de línea dura del gobierno de Trump con respecto al tema (Piconne, 2018). Este contexto brinda tanto oportunidades de expansión, como retos para sostener los avances agroecológicos de la isla. En este artículo, proporcionamos una visión general de la evolución del movimiento agroecológico cubano; analizamos el estado de la seguridad alimentaria y los retos de la soberanía alimentaria en la isla hoy; resumimos los cambios en la política Estados Unidos-Cuba desde diciembre del 2014 que pueden afectar al sector agroalimentario; y concluimos con recomendaciones para apoyar la agroecología (para la seguridad y soberanía alimentaria y la sustentabilidad) bajo esta nueva y cambiante relación.

## **2. Evolución del Movimiento Agroecológico Cubano**

El movimiento agroecológico o de agricultura sostenible en Cuba es a menudo definido como un movimiento nacido de la necesidad después de la caída del Bloque Socialista que causó escaseces de alimentos, combustibles y materiales (llamado el “Periodo Especial”). Aunque lo anterior es cierto, es importante reconocer que el movimiento se basó en el conocimiento de agricultores/as tradicionales e investigadores/as que ya practicaban, investigaban y promovían enfoques más sostenibles para la agricultura durante décadas. Lo que hizo el Período Especial fue abrir el espacio político y económico que permitió que ese tipo de agricultura echara raíces a lo largo de la isla.

Cuando la Unión Soviética colapsó a principios de la década de 1990, la nación isleña experimentó lo que muchas personas consideran una simulación de una situación de pico petrolero (peak oil situation). Los alimentos, el combustible, la maquinaria y otras importaciones se redujeron drásticamente, así como los mercados de exportación para la caña de azúcar. La escasez de alimentos y económica experimentada por los/as ciudadanos/as cubanos/as, y los desafíos enfrentados por productores/as agropecuarios/as para

mantener la producción, fueron hechos aún más difíciles por las leyes de EEUU Toricelli y Helms-Burton, que reforzaron el bloqueo estadounidense contra Cuba. Veinticinco años después, Cuba aún sigue luchando contra la escasez material y económica, pero sigue siendo un líder mundial en la agricultura sostenible y la erradicación del hambre extremo. Esto se debe en mayor parte a las alianzas estratégicas construidas entre agricultores/as, científicos/as y el gobierno para difundir las técnicas alternativas de producción, reducir el uso de agroquímicos e incrementar la producción nacional de frutas, verduras y granos (Altieri y Funes-Monzote, 2012).

Sin embargo, el sistema agroalimentario cubano no está de ninguna manera dominado por sistemas agroecológicos sostenibles. Más bien, es una mezcla de fincas grandes y pequeñas con diversos grados de uso de fertilizantes, plaguicidas y otros insumos, y que representan distintas etapas de transición hacia sistemas agroecológicos integrales. Una dicotomía persiste también en el ámbito político. Tanto investigadores/as y profesores/as, como agrónomos/as y agricultores/as están divididos en sus perspectivas acerca de cuál es el sistema agroalimentario con mayor potencial: algunos caen dentro del campo de la agricultura convencional, mientras que muchos otros abogan por que el gobierno apoye completamente una transición a sistemas agroecológicos sostenibles (Vázquez, et al., 2017). En esta sección, se resumen los cambios que Cuba ha implementado en relación con la tenencia y la gestión de la tierra, la distribución y comercialización de alimentos, la innovación campesina, y la investigación y extensión para desarrollar sistemas agrícolas agroecológicos. También abordaremos los logros del movimiento agroecológico en cuanto a políticas públicas, así como el rol de la cooperación internacional.

## ***2.1 Descentralizando la Tenencia de la Tierra***

Para cualquier modelo de agricultura, la tierra es un activo primordial. En un modelo agroecológico o sostenible, el acceso a y los derechos sobre la tierra son clave tanto para el empoderamiento de los agricultores como para la sostenibilidad del sistema. Al igual que con muchas revoluciones en América Latina, la nacionalización de la tierra a través de la reforma agraria fue decisiva para recuperar la autonomía del estado cubano, así como para gran parte de la población rural (Rodríguez, 1987). Uno de los primeros actos de la Revolución Cubana fue prohibir el latifundio (gran extensión de tierra de propiedad privada) y a través de la Primera y Segunda Ley de Reforma Agraria (en 1959 y 1963 respectivamente) el gobierno estableció como límite máximo 5 caballerías (67.10 ha) por propietario privado, redistribuyó pequeñas extensiones entre campesinos sin tierra, y pasó las demás tierras al control estatal (Rodríguez, 1987).

En la Primera Ley de Reforma Agraria se promovía el cooperativismo entre aquellos pequeños agricultores que retuvieron o recibieron tierra; en 1963, ya se habían creado 3,526 cooperativas (Figueroa-Albelo, 2005)<sup>1</sup>. Sin embargo, la prioridad del gobierno era promover un sector estatal fuerte (Deere et al., 1992; Figueroa-Albelo, 2005), y para el año 1988, más de tres cuartos de la superficie agrícola era manejada por grandes empresas estatales (ver Tabla 1), que además recibían proporcionalmente más recursos que los sectores cooperativo y privado (Deere et al., 1992).

---

<sup>1</sup> En la década de 1960, el estado creó Cooperativas de Crédito y Servicios (CCS) como una estructura en la cual los agricultores poseen o arriendan sus tierras, pero se unen como una cooperativa para compartir crédito, infraestructura y mercados. En la década de 1970, las Cooperativas de Producción Agrícola (CPA) se formaron como una opción para que los agricultores compartieran y trabajaran el mismo pedazo de tierra.

Estas empresas estatales practicaban una agricultura industrial que priorizaba los cultivos con valor comercial, especialmente la caña de azúcar. El modelo fue modestamente exitoso mientras el estado tuvo acceso a los insumos importados y a un mercado seguro; pero, cuando cayó el bloque soviético, el suministro de agroquímicos tocó fondo y la productividad de las granjas estatales disminuyó drásticamente<sup>2</sup> (Funes-Monzote, 2008; Wright, 2009).

En el contexto de una severa crisis alimentaria, Cuba una vez más reestructuró la tenencia de la tierra en 1993, esta vez con el objetivo de descentralizar y así estimular la producción e innovación (Decreto Ley 142). Las granjas estatales fueron divididas en parcelas más pequeñas cuyo manejo recayó en una nueva forma de gestión cooperativa: las Unidades Básicas de Producción Cooperativa (UBPC), manejadas por ex trabajadores estatales y otros nuevos agricultores. La tierra fue otorgada a estos obreros/agricultores gratuita e indefinidamente en régimen de usufructo, lo que permite a los usufructuarios utilizar y ocupar la tierra, aunque no sean propietarios formales de la misma. A cambio, las UBPC debían vender un gran porcentaje de su producción al estado. Adicionalmente, el estado otorgó parcelas pequeñas (de hasta 0.5 hectárea) a personas que no estaban en condiciones de convertirse en agricultores a tiempo completo, para que pudieran cultivar rubros básicos para el consumo familiar (Decreto Ley 142). Las UBPC han tenido resultados mixtos y el porcentaje de superficie de tierra bajo su gestión ha decrecido a lo largo de los años (Tabla 1).

**Tabla 1. Cambios en el porcentaje de superficie agrícola total por formas de gestión, Cuba 1988-2016**

| <b>Tipo de Gestión</b>       | <b>1988</b> | <b>2007</b> | <b>2016</b>                 |
|------------------------------|-------------|-------------|-----------------------------|
| <b>Estatal</b>               | <b>82</b>   | <b>36</b>   | <b>31</b>                   |
| <b>No estatal</b>            | <b>18</b>   | <b>64</b>   | <b>69</b>                   |
| CCS* y agricultores privados | 10          | 18          | 36                          |
| UBPC**                       | 0           | 37          | 24                          |
| CPA***                       | 8           | 9           | 9                           |
| <b>Total</b>                 | <b>100</b>  | <b>100</b>  | <b>100 (6.2 million ha)</b> |

Fuente: ONEI 2017a.

\* Cooperativas de Créditos y Servicios

\*\* Unidades Básicas de Producción Cooperativa

\*\*\* Cooperativas de Producción Agropecuaria

La Tabla 1 muestra la transformación progresiva de las formas de gestión desde una mayoría de granjas estatales en 1988 a una mayoría de unidades con gestión no estatal en 2016. La mayor parte de este cambio ha estado ligado a la creación de las UBPC y al incremento de la superficie agrícola bajo gestión de las Cooperativas de Crédito y Servicios (CCS) y las fincas privadas, a través de los Decretos-Ley 259 y 300, como se explicará más adelante. Es importante notar que esta tabla representa los porcentajes basados en el total de superficie agrícola, de 6.2 millones de hectáreas (ONEI, 2017b). El Ministerio de Agricultura desglosa esta categoría en superficie cultivada (2.7 millones de hectáreas) y no cultivada (3.5

<sup>2</sup> En 1989, Cuba tuvo una tasa de uso de fertilizantes, tractores e irrigación por hectárea significativamente más alta que los Estados Unidos y América Latina (Funes-Monzote, 2008).

millones de hectáreas) (ONEI, 2017b). En adición, la superficie no cultivada consiste en 2.6 millones de hectáreas de pastizales naturales, probablemente bajo algún manejo ganadero, además de 910,000 hectáreas de tierras ociosas (ONEI, 2017a).

En 2008 y 2012 respectivamente, el gobierno de Raúl Castro aprobó dos leyes que han constituido una de las reformas agrarias más progresivas de la actualidad, con el fin de reclutar más cubanos y cubanas para la agricultura y así impulsar la producción de alimentos y reducir la dependencia de alimentos importados. Los Decretos-Ley 259 y 300 (del 2008 y 2012) permiten a ciudadanos sin tierra obtener en régimen de usufructo hasta 13.42 ha (1 caballería) de tierra y a agricultores ya establecidos aumentar la extensión de su finca hasta 67.1 hectáreas, también en régimen de usufructo. Esta política ha facilitado la distribución de más de 1.7 millón de hectáreas de tierra, en su mayoría ociosa, a más de 200 mil agricultores, muchos de los cuales son nuevos en la agricultura (Nova-González y Figueroa-Alfonso, 2018). Lamentablemente, no se ha realizado un análisis exhaustivo del impacto de esta política en la producción de alimentos y la seguridad alimentaria. Anecdóticamente, sabemos que los resultados son mixtos, ya que los nuevos agricultores enfrentan limitaciones en cuanto a conocimiento agrícola, acceso a créditos y préstamos, acceso a insumos básicos (herramientas de mano, semillas, agua, etc.), dificultades para limpiar la tierra de especies invasivas como el marabú y las acacias, e ineficiencias en los sistemas de distribución, entre otros desafíos.

A fines de 2016, aún existían 883,900 mil hectáreas de tierra agrícola sin uso productivo (ONEI, 2017a), mayoritariamente de gestión estatal, lo que llevó al estado a actualizar los Decretos-Ley 259 y 300 en el verano de 2017. En un intento de poner más tierra bajo cultivo y dar mayor seguridad y confianza a agricultores para obtener créditos, las nuevas regulaciones duplicaron la cantidad de tierra que nuevos agricultores pueden solicitar (26.84 ha), y permiten a agricultores individuales obtener los derechos de usufructo por períodos de 20 años y por períodos indefinidos a entidades legales (Hidalgo de los Santos y Doimeadiós Reyes, 2016; Cubadebate, 2017). Las nuevas medidas también permiten la construcción de casas, incentivando aún más la recampesinización del sector rural.

El paso de una mayoría de tierras agrícolas gestionadas en grandes granjas estatales, hacia una mayoría de fincas cooperativas, ofrece condiciones óptimas para el desarrollo continuo de la agricultura sostenible basada en la agroecología. Los pequeños agricultores privados y cooperativos han logrado mayores avances en la producción diversificada de bajos insumos y han mostrado los mayores crecimientos de producción desde el Período Especial, como detallamos abajo (Machín, et al. 2010; Nova-González, 2016; Altieri y Funes-Monzote, 2012). Sin embargo, es importante tener en cuenta que estas transformaciones en la gestión de la tierra no han cambiado la estructura de propiedad; en 2016, el estado aún es propietario del 78.7% de la superficie agrícola del país (ONEI, 2017a).

## ***2.2 Reestructurando la Distribución de Alimentos***

Al mismo tiempo que el Período Especial acentuó las ineficiencias de la agricultura de gran escala e impulsó la redistribución de la tierra, también señaló la necesidad de nuevos modelos de distribución de alimentos (Deere, 1997; Enríquez, 2010; Wright, 2012). Desde los 1960, existieron distintas formas de

distribución de alimentos, aunque la distribución centralizada siempre fue el modelo dominante. La libreta, o sistema de racionamiento, es un sello de la Revolución. Aunque la diversidad y abundancia de los productos alimenticios de la libreta hayan disminuido desde el Período Especial (y al momento de escribir este artículo se discute su eliminación gradual), la libreta sigue proveyendo una importante red de seguridad para las familias y contribuye a un nivel básico de seguridad alimentaria. Durante el Período Especial, el estado cubano comenzó a liberalizar ligeramente la distribución de alimentos a través del establecimiento de distintos tipos de mercados campesinos, de intermediarios y de venta directa, a menudo como experimentos piloto (García-Álvarez y González-Águila, 2016). Esta sección describe brevemente algunos de estos cambios y el funcionamiento general del sistema de distribución de alimentos; sin embargo, debido a la complejidad y los continuos cambios en las regulaciones, no proporcionamos un análisis detallado de precios, las modificaciones de los reglamentos, las ventajas y desventajas de las distintas formas de distribución o los retos del sistema. Más bien, esta sección ofrece una instantánea del modelo de distribución de alimentos en Cuba.

La mayoría de las granjas, tanto del sector estatal como no estatal, mantienen contratos con el estado para vender cierta parte de su cosecha a Acopio, la empresa estatal de distribución. Acopio luego distribuye los alimentos a la población, incluyendo los importados, a través de la libreta y los mercados estatales. Esto es a pesar de algunos cambios realizados para liberalizar la distribución y los mercados para incrementar la disponibilidad y acceso a los alimentos a través de canales no estatales. A lo largo de los años, Acopio ha enfrentado desafíos en la gestión de la distribución, especialmente a medida que la producción agrícola se descentraliza con la gestión pasando del sector estatal al no estatal. En la década del 1990, la agencia comenzó a cambiar hacia un modelo local y regional de compras e instituyó puntos de recogida comunes en un intento por racionalizar sus procesos. Sin embargo, con combustible y transporte limitados, fue difícil para muchas granjas y Acopio sincronizar el trabajo (Wright, 2009) y un volumen significativo de alimentos no fueron recogidos o distribuidos en tiempo.

Como respuesta, el estado creó nuevos mercados campesinos subsidiados y, a partir del 1994, permitió la reapertura de los mercados libres campesinos (Decreto-Ley 191), o sea, mercados de libre oferta y demanda, donde los agricultores pueden vender su sobreproducción directamente a consumidores, a un precio elevado, una vez que hayan cumplido su cuota con Acopio (Álvarez y Messina, 1996). Durante este tiempo, el movimiento de agricultura urbana estaba floreciendo y ofreció una nueva salida para la demanda de alimentos. Los cambios llevados a cabo después del VI Congreso del Partido Comunista en 2011 abrieron nuevas oportunidades para la venta de alimentos, incluyendo la comercialización directa a hoteles y restaurantes, así como los vendedores ambulantes conocidos como carretilleros.

Estos cambios han ayudado a poner en circulación más alimentos de producción nacional, pero aún restan muchos desafíos. La escalada de precios en los mercados libres es inaccesible para muchos cubanos y, los problemas de almacenamiento y distribución hacen que se desperdicien un monto importante de alimentos. Álvarez (2004) calculó que entre 10-15% de los alimentos disponibles se han desperdiciado desde los 1980. En 2017, un informe financiado por la Agencia Española de Cooperación Internacional para el Desarrollo reportó que hasta el 57% de los alimentos producidos en Cuba se pierden antes de llegar al consumidor: 30% en las fases de cosecha y pos-cosecha y 27% en la fase de distribución a las poblaciones locales y regionales. Los investigadores atribuyen esa pérdida al uso de equipos obsoletos, sistemas de transporte y almacenamiento deficientes, y procesamiento insuficiente en las fases iniciales de cosecha (OnCuba, 2017). Estas cifras no están lejos de los promedios globales de pérdida de alimentos

que han sido identificados como un problema clave que debe abordarse para mejorar la seguridad alimentaria mundial. Sin embargo, en los países industrializados las causas del desperdicio de alimentos tienen más que ver con la sobreproducción capitalista y el modelo de venta minorista en supermercados donde se saturan las estanterías (Holt-Giménez, 2017).

En Cuba este problema difícilmente se resuelva sin un incremento de capital y recursos; no obstante, el estado ha comenzado a priorizar las “minindustrias”, a saber, la producción en pequeña escala de alimentos procesados (como el puré de tomate, productos a base de frutas como jugos y mermeladas, el yogurt, el pasta de ajo, la yuca deshidratada, etc.) directamente en las fincas. Si bien no está claro el impacto que tendrá esta iniciativa a nivel nacional, los primeros ejemplos indican (de manera anecdótica) un mayor ingreso para los productores, un mejor acceso a opciones saludables para el consumo local y una menor pérdida de alimentos.

### **2.3 Innovación campesina, investigación y la descentralización de la asistencia técnica**

Aunque la escasez material y el acceso limitado a los insumos ayudaron a desencadenar el movimiento agroecológico, lo cierto es que un grupo de investigadores y agricultores había estado promoviendo lentamente un cambio a lo largo de los 80<sup>3</sup>. Estas personas ya se habían percatado de los impactos negativos del sistema altamente industrializado en la productividad, el medio ambiente y la salud; y estaban explorando la viabilidad de los sistemas agroecológicos, incluso antes del Período Especial. Cuando el derrumbe de la Unión Soviética creó una apertura política y económica para su trabajo, ellos encontraron la oportunidad para construir convenios entre institutos de investigación, ministerios y organizaciones internacionales; y generar una infraestructura sólida y vínculos sistemáticos entre diversos proyectos agrícolas alternativos. Un principio básico que subyace a muchos de estos esfuerzos fue la importancia de ayudar a los campesino/as a compartir sus conocimientos tradicionales, llevar a cabo proyectos y generar innovaciones.

Resultó esencial para la difusión de la agroecología, siendo esta una ciencia y práctica de uso intensivo del conocimiento, el fuerte capital humano e institucional que Cuba había cultivado durante décadas. En los primeros años de la Revolución, el estado cubano reconoció el papel clave que la investigación y el apoyo técnico podrían desempeñar en el avance del sector agropecuario. En los 60 y 70 se crearon docenas de instituciones de investigación agropecuaria en todo el país. El cuerpo de investigaciones acumulado a lo largo de los años por estas instituciones deja evidencia clara y cada vez más contundente de la naturaleza insostenible e ineficiente de la agricultura convencional, incluso antes del Período Especial, por lo que ya se prestaba algo de atención a la agricultura alternativa (Vásquez, et al. 2017). Uno de los proyectos de investigación relacionados con la agroecología de fecha más temprana fue iniciado por científicos del Instituto de Investigación de la Caña de Azúcar y el Instituto de Sanidad Vegetal, quienes en los 70 comenzaron a investigar el control biológico. Los resultados de estas investigaciones constituyeron la base científica para la creación de los Centros de Reproducción de Entomófagos y Entomopatógenos (CREE) en la década de 1980, que son laboratorios estatales que investigan y producen, a nivel local, agentes de control biológico para el manejo de plagas y el aumento de la producción agrícola. En los 90, a medida que aumentaba la demanda de estos productos, su trabajo se intensificó. Además, Labiofam, una empresa

---

<sup>3</sup> Existían investigadores de diferentes institutos que habían estado abogando por un cambio. Algunos de ellos se unieron y formaron la Asociación Cubana de Agricultura Orgánica conocida como ACAO. La ACAO, bajo la dirección de Fernando Funes-Aguilar, recibió el Premio Right Livelihoods Award en 1999.

estatal de producción de productos químicos y farmacéuticos, comenzó a desarrollar productos biológicos en mayor escala para el control de plagas y el manejo de nutrientes en sistemas agroecológicos. Como estas instancias proveían productos agroecológicos a agricultores, otras instituciones estatales también desarrollaron técnicas y herramientas compatibles con la agroecología. Por ejemplo, los programas estatales de innovación rural promovieron el uso de tracción animal (en vez de tractores) para la labranza. Muchas instituciones de investigación y asociaciones como el Instituto de Investigaciones Fundamentales en Agricultura Tropical (INIFAT), la Fundación Antonio Núñez Jiménez (FANJ), la Estación Experimental de Pastos y Forrajes 'Indio Hatuey', la Universidad Agraria de La Habana, el Instituto Nacional de Ciencias Agrícolas, el Instituto de Investigaciones de Viandas Tropicales (INIVIT) y otros se enfocaron en diferentes formas de agricultura sostenible de bajos insumos externos. Aún más, la naturaleza descentralizada de los institutos de investigación y servicios agropecuarios estatales jugó un rol importante en el amplio desarrollo de la agroecología, dado que un principio de la agroecología es la importancia de las soluciones locales, contextualmente específicas a problemas de la producción.

No solo se produjo un cambio respecto al enfoque investigativo y las tecnologías promovidas en algunas instituciones, sino que también se transformó la forma en que se llevaba a cabo la investigación, la educación y la extensión. Si bien hoy la tendencia sigue siendo la transferencia vertical de conocimiento de arriba hacia abajo del instituto de investigación hacia el productor, el crecimiento de la agroecología se combinó con el desarrollo de enfoques más integrales, participativos, interdisciplinarios y desde abajo hacia arriba para el desarrollo rural (Vásquez, et al. 2017). Gran parte de este cambio se inspiró en las metodologías de educación popular promovidas por el Centro Martin Luther King en La Habana, entre otras entidades. Las estaciones de investigación como Indio Hatuey comenzaron a desarrollar relaciones con campesinos y campesinas.

Quizás el mejor ejemplo del modelo de co-aprendizaje de persona a persona fomentado por los principios agroecológicos es el movimiento campesino-a-campesino de la Asociación Nacional de Agricultores Pequeños (ANAP). El Movimiento Agroecológico de Campesino a Campesino (MACAC) fue creado por ANAP como proyecto piloto en 1996, inspirado por ejemplos de Mesoamérica, y en 2003 ya estaba en todas las provincias del país. El MACAC reúne a los/as agricultores/as para compartir técnicas agrícolas tradicionales, así como la aplicación de nuevas técnicas agroecológicas. En lugar de conceptualizar la innovación tecnológica y práctica como un proceso de arriba hacia abajo, es un modelo horizontal de construcción e intercambio de conocimiento participativo, llevado a cabo en asociación con organizaciones investigativas, técnicas y profesionales (ANAP, 2015; 2016). El MACAC desempeñó un papel enorme en la diseminación de las prácticas sostenibles a lo largo del país y también influyó en la incorporación de la transferencia agroecológica horizontal en otras partes del mundo a través de la relación con el movimiento campesino internacional, La Vía Campesina. En 2011, investigadores reportaron que el MACAC había alcanzado 110 mil de las 350 mil familias campesinas en Cuba (Rosset, et al., 2011). En la actualidad, cada dirección provincial de la ANAP tiene un facilitador de MACAC que promueve la agroecología y cada cooperativa participante del movimiento tiene también promotores. Algunos campesinos reportan que los intercambios campesino-a-campesino no están tan activos como antes, lo que es probablemente el resultado de las limitaciones en el financiamiento para transporte y organización de las actividades (Williams, 2017).

## ***2.4 Programa de Agricultura Urbana, Suburbana y Familiar***

El movimiento de agricultura urbana fue clave para mitigar la crisis alimentaria de los 1990 y hoy es uno de los espacios más importantes, junto al MACAC, para la promoción de la agroecología. La producción de alimentos dentro de los límites urbanos en Cuba comenzó como un movimiento popular a pequeña escala, en patios y techos, como respuesta a la crisis alimentaria. Dado que cerca del 80% de la población cubana vive en contextos urbanos, el gobierno vio enorme potencial para enfrentar a la crisis a través de la agricultura urbana (Funes y Vázquez, 2016). Dentro de poco tiempo surgió una diversidad de formas y escalas de producción en las ciudades a lo largo de la isla con el apoyo del Ministerio de Agricultura, institutos de investigación, asociaciones y gobiernos locales. Hoy, la agricultura urbana es regulada, gestionada y apoyada por el Programa de Agricultura Urbana y Suburbana (PIAUS) dentro del Instituto Nacional de Investigaciones Fundamentales en Agricultura Tropical (INIFAT), que pertenece al MINAG (Companioni, et al., 2016). Este programa garantiza que las “granjas urbanas” (ya sea en barrios densamente poblados de La Habana, ciudades medianas, pueblos pequeños u otras áreas residenciales) se dispersen por todos los municipios de Cuba y que cuenten con la necesaria infraestructura. La agricultura urbana y suburbana de Cuba abarca 12,588 km<sup>2</sup> de la isla y representa el 14% de la superficie agrícola del país. Incluye toda la provincia de La Habana, un radio de 10 km desde el centro de cada capital de provincia, un radio de 5 km desde cada cabecera municipal y un radio de 1 a 2 km de cada pueblo con más de 1000 habitantes (Companioni, et al., 2016). El hecho de que existían grandes áreas de tierra ociosa ayudó a fomentar el movimiento. Los beneficios de la agricultura urbana han sido significativos para la seguridad alimentaria, el empleo, los servicios ambientales, la educación y la salud, así como para formas localizadas de soberanía alimentaria. El PIAUS junto a las granjas y proyectos que el programa ha apoyado, han sido influyentes en la promoción de las capacidades locales y el control sobre la producción de alimentos, asimismo han propiciado una mayor autonomía respecto de los mercados centralizados (Rodríguez-Nodals, et al., 2006; Companioni, et al., 2016; INIFAT, 2016).

La política nacional ha jugado un rol importante en la aceptación y proliferación de la agricultura urbana. Ya en 1987, antes de la crisis, Raúl Castro, desde su puesto como jefe de las Fuerzas Armadas, inició la producción de alimentos para los comedores de esa misma institución, a través de la producción intensiva en camellones llamados organopónicos. Cuando llegó la crisis alimentaria, los organopónicos ya eran una forma de producción popular que se difundía en las ciudades de Cuba. Todos los ministerios, instituciones y escuelas fueron instados a romper céspedes y producir alimentos para su autoabastecimiento. En los *Lineamientos de la Política Económica y Social del Partido y la Revolución* de 2011 y 2016, un documento político clave publicado por el gobierno en los dos últimos congresos del partido, hay dos lineamientos específicamente dirigidos al desarrollo y la implementación de la agricultura urbana y la reducción de insumos (ver próxima sección para más información).

El movimiento de agricultura urbana ha generado más de 300,000 empleos y capacitado docenas de miles de agricultores, técnicos y funcionarios gubernamentales en técnicas agroecológicas, a través de numerosas capacitaciones e intercambios formales e informales, incluyendo las colaboraciones con el MACAC de la ANAP (Companioni, et al., 2016). Las granjas urbanas también gestionan programas educativos con las escuelas primarias y suministran alimentos altamente subsidiados a escuelas, hospitales, casas de ancianos y otras instituciones sociales.

En cuanto a desempeño productivo, el sector de la agricultura urbana en Cuba produce alrededor del 50% de las frutas, verduras y hortalizas consumidas en el país, llegando a ser más de un millón de toneladas de

producción en 2014. En lo que se refiere a área, en el año 2014, había 2,855 organopónicos en 1,366 hectáreas y 6,875 huertos intensivos en 6,787 hectáreas. La venta de productos de la agricultura urbana supera los 4,7 mil millones de pesos (\$188 millones de USD) anualmente (Companioni, et al., 2016).

Otra contribución clave del movimiento de agricultura urbana ha sido la mayor disponibilidad y acceso de la población cubana a una selección diversa de frutas frescas, vegetales y plantas medicinales. Esto ha servido para incrementar la diversidad de la dieta de la población y mejorar la nutrición en una dieta tradicionalmente dominada por carne, arroz, frijoles y viandas. La mayor parte de estos cultivos básicos se produce todavía en áreas rurales o se importa.

## **2.5 Resiliencia y Agroecología en Cuba**

La cuestión de la resiliencia en los sistemas agroalimentarios siempre es importante, sin embargo, en un contexto de cambio climático, incrementando la ocurrencia de situaciones climáticas extremas a nivel global (IPCC, 2014), es aún más urgente. El concepto de resiliencia alcanza muchas disciplinas y en las últimas décadas ha llegado a ser un concepto popular en los temas de cambio climático y desarrollo, así como en la investigación, práctica y política de la agricultura (Caswell, et al., 2016; Bene, et al., 2012; Folke, et al., 2002; Frankenberger, et al., 2014; Altieri, et al., 2015). Los vínculos entre la resiliencia y la agroecología son fuertes y abundantemente documentados en la literatura (Holt-Giménez, 2002; Altieri y Nicholls, 2012; Koohafkan, et al., 2012; Kerr, et al., 2016; Altieri y Toledo, 2016; Caswell, et al., 2016; Greenpeace, 2015). Sin lugar a dudas, en Cuba la experiencia de resiliencia es profunda, una sociedad que soportó las múltiples tensiones y conmociones del colonialismo, del bloqueo norteamericano, del Período Especial y últimamente, de los efectos del cambio climático. Los avances de la agroecología cubana van de la mano con su espíritu de resiliencia. La combinación de redes sociales sólidas y el apoyo gubernamental (para la preparación y respuesta ante desastres) a las fincas agroecológicas ha resultado en una mayor capacidad de recuperación para esas fincas y comunidades ante los efectos cada vez mayores de sequías, inundaciones y huracanes, así como los choques y estresores socio-económicos documentados por varios investigadores cubanos (Machín Sosa, et al., 2010; Vázquez, et al., 2016). Este es un área más donde podemos aprender de Cuba.

En un estudio realizado justamente después de que el huracán Ike azotara a Cuba en 2008, Machín Sosa, et al. (2010) hallaron que las fincas agroecológicas tuvieron una pérdida de cosecha del 50% en contraste con la pérdida de cosecha del 90-100% en fincas convencionales de monocultivo. El mismo estudio también encontró que los niveles de recuperación vegetativa a los 40 días después del evento climático fueron mucho mayores en las fincas agroecológicas que en los monocultivos convencionales. Existen varias prácticas: físicas (diversidad de cultivo, vegetación de múltiples estratos, rompevientos, conservación de suelo), biológicas (diversidad genética con variedades resistentes) y humano-sociales (redes fuertes de apoyo social en cooperativas, comunidades, familias, sentido de pertenencia y compromiso con la finca) que se aplican en los sistemas agroecológicos que contribuyen a su resiliencia. El concepto de diversidad en todos los aspectos, como herramienta para difundir el riesgo e incrementar la resiliencia, es esencial en las fincas agroecológicas cubanas. Vázquez, et al. (2016), en un estudio reciente acerca de la sequía y la resiliencia en la región oriental de Cuba, encontraron que aquellas fincas que integraron sus cultivos con frutales, que eran cultivadas por campesinos tradicionales y que eran administradas por mujeres poseían un mayor grado de resiliencia ante la sequía que las fincas

convencionales de mayor tamaño, con una mezcla de agricultores tradicionales y convencionales, y manejadas por hombres. Ese estudio enfatizó no solo la importancia del manejo ecológico de finca, sino también la importancia de una red de actores articulados basada en un conjunto de valores guiados por el capital social, humano, económico, ecológico y físico. Una red como esta valoriza a aquellos campesinos que hayan demostrado su resiliencia a través de las prácticas innovadoras y que estén integrados a una red de actores locales. Los autores enfatizan la necesidad de establecer relaciones fuertes con actores externos que juegan un rol importante en los esfuerzos de recuperación post-evento, así como la transformación constante del sistema agrícola en un sentido más amplio desde líneas agroecológicas y sostenibles. En septiembre de 2017, el huracán Irma tocó tierra en Cuba en medio de una sequía de varios años, devastando la industria azucarera nacional e impactando más de 300,000 hectáreas de caña de azúcar, según informes oficiales (Granma, 2017). Una evaluación más completa de los impactos de Irma sobre los distintos sistemas productivos agropecuarios aún no se ha producido. Sin embargo, Casimiro (2017) cuenta la experiencia de una finca agroecológica en la provincia de Sancti Spiritus, Finca del Medio, analizando las prácticas resilientes que implementan. Las experiencias de investigación e implementación de fincas resilientes a través de principios agroecológicos merecen mayor atención por las lecciones aprendidas, particularmente para Puerto Rico y otras islas del Caribe.

## ***2.6 La Agroecología en las Políticas y los Lineamientos***

La diversidad de programas, proyectos e iniciativas que se han implementado durante las últimas dos décadas han ayudado a elevar las ideas, técnicas y políticas agroecológicas a la vanguardia del debate en Cuba (Vázquez, et al., 2017). Inicialmente, estas iniciativas tuvieron objetivos muy prácticos para enfrentar la escasez de alimentos y la crisis económica durante el Período Especial. En las décadas posteriores, sin embargo, han llegado a constituir la base de un compromiso mayor por parte del estado cubano de implementar la agroecología dentro del sistema alimentario cubano, lo que cada vez más se traduce en leyes y en la planificación estratégica del desarrollo. La mayor parte de las políticas para la agricultura en Cuba se relacionan con una transición hacia sistemas económica y políticamente sostenibles, sobre todo en respuesta a los impactos negativos de los factores socioeconómicos externos, como el bloqueo y la caída del Bloque Socialista (Vázquez, et al., 2017).

Uno de los documentos más importantes que establece el marco para leyes y decretos en Cuba es el que se publica después del Congreso del Partido Comunista de Cuba, que se lleva a cabo cada cinco años, y señala las estrategias económicas y sociales para el desarrollo nacional: los Lineamientos de la Política Económica y Social del Partido y la Revolución. La versión más actual, impresa en 2017, aborda específicamente la política agropecuaria en 30 lineamientos (del 150 al 179) (PCC, 2017). En general, los lineamientos implican y permiten el apoyo de un modelo “combinado” que promueve tanto la agroecología como la agricultura convencional, en dependencia del contexto y la interpretación actual acerca de qué es más factible para la economía planificada.

Aunque el término agroecología no está explícitamente utilizado en los lineamientos del congreso del partido, hay varias secciones que describen principios asociados con la agroecología. El lineamiento 159, por ejemplo, señala que, para desarrollar una agricultura sostenible es necesario reconocer las distintas escalas productivas dentro del sistema alimentario. El lineamiento 160 enfatiza la necesidad de priorizar la conservación, protección y mejoramiento de los recursos naturales, donde se incluyen también los

recursos genéticos, hídricos y de suelo. Estos lineamientos destacan la propuesta de que Cuba debería dejar de ser un importador de alimentos y trabajar para la sustitución de importaciones (lineamientos 150, 163, 165 y 169). Dos de las maneras en que se esto es enfatizado es a través del llamado a desarrollar el auto-abastecimiento alimentario municipal y el apoyo al Programa Nacional de Agricultura Urbana, Periurbana y Familiar (173 y 174) (PCC, 2017). En los lineamientos de 2011, el lineamiento 185 destaca la importancia de la sustitución de importaciones al priorizar un enfoque territorial de la agricultura, incentivando la producción local para el consumo local a través del programa urbano y periurbano. El lineamiento 187 aborda la importancia de utilizar las prácticas agroecológicas para incrementar los rendimientos a través de la diversificación, rotación de cultivos y policultivos y “Desarrollar una agricultura sostenible en armonía con el medio ambiente, que propicie el uso eficiente de los recursos fito y zoogenéticos, incluyendo las semillas, las variedades, la disciplina tecnológica, la protección fitosanitaria, y potenciando la producción y el uso de los abonos orgánicos, biofertilizantes y biopesticidas” (PCC, 2011, p. 27).

La implementación de estas políticas se ha materializado en la formulación de leyes, decretos, programas, planes y proyectos en distintos sectores, lo que puede verse, por ejemplo, en la reciente Ley 124 de Aguas Terrestres de 2017 y en el Decreto-Ley 337 que regula esta ley. El 25 de abril del 2017, el plan estatal llamado Tarea Vida: Enfrentando el Cambio Climático en la República de Cuba se aprobó, en el cual seis de las 11 tareas son relacionadas con la producción de alimentos, la seguridad alimentaria, la salud humana, animal y vegetal, además de la conservación de recursos naturales (CITMA, 2017).

Otra política importante para respaldar a la agroecología es el Programa de Auto-Abastecimiento Alimentario Municipal del MINAG que se inició en el 2015. En el documento oficial que respalda esta política se establece que la soberanía alimentaria es una de las principales prioridades del estado y el gobierno cubano y que la estrategia clave para lograrla es la descentralización del sector agropecuario, a través del aumento de la capacidad de las comunidades y los municipios para alimentarse. La política plantea que la capacidad municipal de abastecer a la población debería incluir la “participación de todos los actores del territorio (productores individuales, cooperativistas, empresas estatales, delegaciones municipales de agricultura) para lograr el desarrollo de una economía sólida a nivel municipal, basada en principios agroecológicos, según contextos climáticos y demográficos locales, integrándose todos las facetas del bienestar municipal, incluyendo la cultura agraria y alimentaria tradicional de la población” (MINAG, 2015).

Gran parte de los logros de la agroecología a nivel político en Cuba ha partido de la institucionalización de los principios y el pensamiento agroecológico en varios organismos y a muchas escalas dentro del sistema agroalimentario cubano. Diversas iniciativas, como el movimiento campesino-a-campesino, que arraigaron durante el Período Especial, se han centrado en la integración vertical y horizontal dentro del sistema alimentario, facilitando los intercambios entre campesinos, instituciones de investigación, servicios de extensión y el estado cubano. Este enfoque holístico, que vincula las experiencias y los éxitos locales con los esfuerzos productivos nacionales, es necesario para crear un contexto fértil para que la agroecología pueda implementarse de manera significativa (Vázquez, et al., 2017).

## 2.7 El Rol de la Cooperación Internacional, Colaboración y Solidaridad

Aun cuando la evolución de la práctica, ciencia y movimiento de la agroecología en Cuba ha sido altamente endógena, con la participación de una diversidad de actores en la isla, las organizaciones internacionales también tuvieron un rol importante. Algunas organizaciones claves incluyen a Oxfam, Welt Hunger Hilfe, Bread for the World, Food First, HIVOS, Sociedad Española de Agricultura Ecológica, Mundubat, OIKOS, CARE, COSUDE, UNDP, entre otras. Algunos de los proyectos financiados por estas organizaciones han aportado un financiamiento importante para la agricultura cubana (la Tabla 2 provee un resumen de los proyectos recientes de cooperación financiera internacional que han promovido la agricultura sostenible), otros han contribuido a través de colaboraciones investigativas y algunos han aportado motivación intelectual y política. Por ejemplo, el movimiento campesino internacional, La Vía Campesina, invitó a la ANAP a unirse a su coalición a principios de los 1990, y los grupos han colaborado no solamente en la diseminación de prácticas agroecológicas y conocimiento, sino también en la elaboración de una base teórica para la agroecología y la soberanía alimentaria.

**Tabla 2. Listado de Proyectos Clave de Cooperación Internacional para la Agricultura Sostenible y/o la Agroecología**

| Nombre del Proyecto                                                                     | Descripción                                                                                                                                       | Socios Cubanos                     | Socios Internacionales                      |
|-----------------------------------------------------------------------------------------|---------------------------------------------------------------------------------------------------------------------------------------------------|------------------------------------|---------------------------------------------|
| <i>Bases Ambientales para la Sostenibilidad Alimentaria Local (BASAL) [2012-2017]</i>   | Facilitar el intercambio de saberes, promover las estrategias adaptativas frente las amenazas del cambio climático.                               | CITMA<br>MINAG                     | UNDP<br>COSUDE<br>EU                        |
| <i>Proyecto de Apoyo a una Agricultura Sostenible en Cuba (PAAS) [2013-present]</i>     | Capacitación para mejorar la producción de, y acceso a, los alimentos orgánicos y para desarrollar un sistema de certificación participativa.     | ACTAF                              | COSUDE<br>Hivos                             |
| <i>Biodiversidad Agrícola en Ecosistemas Protegidos Cubanos (COBARB) [2013-present]</i> | Abordar los problemas de seguridad alimentaria y conservación mediante la integración de sistemas agroecológicos en las áreas protegidas de Cuba. | INIFAT<br>MINAG<br>MINREX<br>CITMA | UNESCO<br>FAO<br>Biodiversity International |
| <i>Articulación Agroecología [2011-2015]</i>                                            | Demostrar la escalabilidad y sostenibilidad funcional del modelo agroecológico para lograr la nutrición local y la seguridad alimentaria.         | ACTAF<br>MINAG                     | EU<br>Hivos<br>COSUDE                       |
| <i>Programa Innovación Agrícola Local (PIAL) [200-2017]</i>                             | Mejorar la innovación campesina y cooperativa a nivel local, con énfasis en las semillas.                                                         | INCA                               | COSUDE                                      |

|                                                                                             |                                                                                                                                              |                                                                       |                   |
|---------------------------------------------------------------------------------------------|----------------------------------------------------------------------------------------------------------------------------------------------|-----------------------------------------------------------------------|-------------------|
| <i>Co-Innovación [2011-present]</i>                                                         | Integración horizontal entre actores e instituciones para apoyar el intercambio y la innovación tecnológica para la producción de alimentos. | Indio Hatuey<br>CIAP<br>IBP                                           | EU<br>CARE France |
| <i>La biomasa como fuente renovable de energía para el medio rural (BIOMAS) [2009-2017]</i> | Integración de la producción de biogas y biodiesel local con la producción de alimentos, para la seguridad alimentaria y energética.         | Indio Hatuey<br>MINAG<br>Ministerio de Energía<br>Ministerio de Minas | COSUDE            |

**Acrónimos—Socios Cubanos:** Ministerio de Ciencia, Tecnología y Medio Ambiente (CITMA), Ministerio de Agricultura (MINAG), Ministerio de Relaciones Exteriores (MINREX), Ministerio de Energía y Minas (MINEM), Instituto de Investigaciones Fundamentales de Agricultura Tropical (INIFAT), Asociación Cubana de Técnicos Agrícolas y Forestales (ACTAF), Instituto Nacional de Ciencias Agrícolas (INCA), Centro de Investigación Agropecuario (CIAP), Instituto de Biotecnología de las Plantas (IBP); **Socios Internacionales:** Programa de las Naciones Unidas para el Desarrollo (UNDP), Agencia Suiza para el Desarrollo y la Cooperación (COSUDE), Unión Europea (UE), Organización de las Naciones Unidas para la Educación, la Ciencia y la Cultura (UNESCO), Organización de las Naciones Unidas para la Agricultura y la Alimentación (FAO), CARE Internacional de Francia (CARE Francia).

*Fuente: Elaborado por autores.*

La Tabla anterior es tan solo una muestra del amplio apoyo y la colaboración entre gobiernos y organizaciones en su mayoría europeos y Cuba. Cabe destacar que Estados Unidos está ausente en la tabla debido a que proyectos formales de cooperación internacional<sup>4</sup> (con un componente financiero definido) entre EEUU y Cuba han sido restringidos por las sanciones estadounidenses contra Cuba. Uno de los cambios que Obama impulsó, en marzo 2016, abrió un espacio para permitir que fondos sean transferidos a las instituciones cubanas a través de subvenciones. Hasta la fecha no ha sido ejecutado ningún proyecto de financiamiento en el sector agrícola, pero hay intentos en proceso por parte de las redes de apoyo en EEUU para apoyar la agroecología cubana a través de este mecanismo. No obstante, han existido otras muchas formas de intercambio en que los movimientos agroecológicos, cooperativos y de agricultura sostenible de ambos países han interactuado. Aunque las relaciones oficiales entre los gobiernos de Cuba y Estados Unidos cesaron en los 1960, los ciudadanos de ambos países han encontrado formas de encontrarse, particularmente a través de relaciones académicas y de la sociedad civil. Notable ha sido la labor de los grupos de solidaridad como Pastores por la Paz, la Brigada Venceremos, Testigo para la Paz y otros grupos de base. Durante las últimas tres décadas, se han realizado cientos de intercambios centrados en la agricultura, entre productores cubanos y estadounidenses, defensores de la agricultura alternativa, decisores y académicos que han tomado parte en una diversidad de talleres participativos, reuniones y otros intercambios relacionados con la agroecología, la soberanía alimentaria, la seguridad alimentaria, el cambio climático, etc. A menudo convocados por organizaciones no gubernamentales (ONG) o instituciones académicas estadounidenses que han solicitado permiso para llevar a cabo viajes “de persona-a-persona” o educativos, estos intercambios han sido un aspecto importante de la construcción de relaciones entre los ciudadanos de Estados Unidos y Cuba y han contribuido al desarrollo

<sup>4</sup> Los proyectos de cooperación internacional en Cuba tienen una definición específica que involucra la transferencia de fondos, se guían por la Resolución 2015 y, por lo general, requieren que los Términos de Referencia se firmen con el Ministerio de Comercio Exterior (MINCEX).

de los movimientos de agricultura alternativa en ambos países. La primera delegación de Estados Unidos que específicamente examinó la agricultura y la alimentación en Cuba fue liderada por Peter Rosset de Food First y Medea Benjamin de Global Exchange a principios de los 1990. Miguel Altieri, de la Universidad de California, en Berkeley, también estuvo involucrado durante esa etapa y desde entonces ha sido un colaborador clave para el movimiento agroecológico en Cuba. Esto llevó a intercambios continuos organizados tanto por Food First como por Global Exchange. Hay un sinnúmero de otras universidades y organizaciones que han organizado intercambios de aprendizaje y que realizan investigación en colaboración con los principales institutos en Cuba. Estos incluyen a la Universidad de la Florida, que ha tenido una relación con la Universidad de La Habana desde el 1993 (como denota Álvarez, 2004), así como la Universidad Americana, la Universidad de Vermont, la Federación de Cooperativas del Sur, la Red EcoCuba, el Instituto Caribeño de Vermont, la Red de Agroecología Cuba-Estados Unidos (CUSAN), la Iniciativa de Investigación por el Desarrollo Sostenible de Cuba (RISDoC) y el Grupo de Trabajo Cuba-Estados Unidos del Alianza Nacional de Empresas Cooperativas (NCBA), entre otras.

### **3. Dependencia de Importaciones, Producción Agrícola y Seguridad Alimentaria**

Dado los éxitos del pueblo y gobierno cubano para promover y ampliar la agroecología en la isla, muchos se preguntan ¿por qué, si este enfoque ha sido tan eficaz, existen aún tantos problemas con la disponibilidad y el acceso a alimentos diversos en Cuba, y la isla sigue importando tantos alimentos? En esta sección, ponemos a consideración diferentes análisis acerca de la dependencia de la importación de alimentos, abordamos estadísticamente los cambios en la producción nacional de distintos rubros en los sectores estatal y no estatal, analizamos datos de seguridad alimentaria y discutimos el rol de la agroecología y de la soberanía alimentaria en este contexto.

El debate sobre hasta qué punto Cuba produce su propia comida versus importación, y sobre el papel de los esfuerzos agroecológicos en la producción total y seguridad alimentaria en la isla, es abundante en la literatura (Altieri y Funes-Monzote, 2012; Avery, 2009; Álvarez, 2004; Álvarez y Messina, 1996; Machín, et al., 2010; USDA FAS, 2015; Spoor y Thiemann, 2016), con una variedad de opiniones derivadas del uso de distintos datos, anécdotas e interpretaciones. Intentar delinear un cuadro realista del sistema alimentario cubano requiere no solamente navegar por conjuntos de datos complejos y a menudo contradictorios, sino también navegar por narrativas políticas contestatarias que marcan los debates acerca del desarrollo agrario y Cuba en general (Mesa-Lago, 1998; Álvarez, 2004; Wright, 2009). En el presente, combinamos el uso de las estadísticas nacionales oficiales (de la Oficina Nacional de Estadística e Información, ONEI) con datos secundarios internacionales (de FAOSTAT). Aunque estos últimos están basados en los datos de ONEI, con frecuencia las cifras no se corresponden (ver Spoor y Thiemann, 2016, para más detalles).

Una de las limitaciones claves para atribuir cualquier causalidad o correlación entre los cambios en la producción, importaciones o la seguridad alimentaria y el desarrollo de enfoques agroecológicos o de bajos insumos en la isla, es que la información estadística nacional sobre la agricultura no distingue entre las diferentes modalidades de producción. Sin embargo, podemos partir de los siguientes supuestos, basados en los programas y las prioridades del Estado:

- El Programa de Agricultura Urbana y Suburbana se basa en los principios de la agroecología, por lo que podemos suponer que todas las fincas del programa son agroecológicas, aunque en distinta medida (Companioni, et al., 2016).
- El Movimiento Agroecológico de Campesino a Campesino (MACAC) de la ANAP está también firmemente basado en los principios de la agroecología, con la participación de más de 100,000 familias (Rosset, et al., 2011).
- Los Polígonos de Suelos creados por el Instituto de Suelos promueven prácticas agroecológicas para la conservación de suelos en grandes paisajes (Aguilar, et al. 2015).
- El Programa Nacional de Productos Biológicos del Ministerio de Agricultura integra una red de más de 200 CREEs y 4 plantas de producción de bioplaguicidas. Los productos así fabricados se emplean en más de 1.5 millones de hectáreas anualmente.
- La agroecología ha sido mucho más promovida en el sector no estatal (privado y cooperativo) que en el sector estatal.
- Hay docenas de programas de cooperación internacional que promueven la agroecología en diferentes grados (ver sección 3.6).
- La mayoría de los cultivos designados de alta prioridad por el Estado se producen en sistemas de monocultivo a gran escala y reciben “paquetes tecnológicos” que incluyen fertilizantes sintéticos, plaguicidas, semillas y otros equipos para la agricultura convencional. Estos incluyen arroz, cítricos, azúcar, frijoles, papa y tabaco, entre otros. Estos tienden a ser producidos en las empresas estatales. Muchos son parte del Programa de Polos Productivos.
- El sector no estatal sirve como indicador de los sistemas agroecológicos, orgánicos y de bajo insumos
- El uso de fertilizantes, plaguicidas y tractores no ha recuperado los niveles pre-Período Especial. La mayor parte de la agricultura en Cuba es una mezcla de prácticas agroecológicas integradas y de bajos insumos, en diferentes grados, con algunas granjas estatales que implementan sistemas de altos insumos, pero aún no en los niveles de la década del 80.

### **3.1 Importaciones alimentarias**

En 2009, Dennis Avery del Centro de Asuntos Alimentarios Globales en el Instituto Hudson, desató un polémico debate con la afirmación de que “el 84% del consumo actual de alimentos en Cuba es importado” (Avery, 2009). Si Cuba sigue dependiendo de alimentos importados, pensó, entonces “el éxito orgánico fue toda una mentira” (Avery, 2009). En un artículo de 2012, los agroecólogos Miguel Altieri y Fernando Funes-Monzote (2012) se enfrentan directamente a esas afirmaciones, argumentando que la cifra es una malinterpretación no corroborada de una nota de prensa de 2007. La nota de prensa, publicada por el periódico Granma, cita a la entonces Viceministra del Ministerio de Economía y Planificación, Magalys Calvo, diciendo que el 84% de los rubros de la canasta básica incluida en la libreta (el sistema de racionamiento estatal) son importados (Granma, 2007). Aunque el sistema estatal de racionamiento alguna vez cubrió una gran parte de las necesidades alimentarias de los hogares, desde el Período Especial su capacidad de abastecimiento ha decrecido sustancialmente. Diversos investigadores, la FAO y la ONEI, proveen datos que muestran que la dependencia de las importaciones de alimentos ha disminuido continuamente entre los 1980 y los finales de los 1990, como muestra la Figura 1 (Álvarez, 2004; Altieri and Funes-Monzote, 2012; Shultz, 2012; FAO, 2016; ONEI, 2017b). Datos más recientes de la FAO y la ONEI, del 2013, sugieren que la dependencia de alimentos importados fluctúa alrededor del 40%, una cifra mucho menor que la que Avery (2009) afirma, menor a la dependencia alimentaria registrada

durante los años 1980 antes de la introducción sistemática de agroecología a la isla, y menor que la cifra de 80% que es comúnmente citada hoy en día.

**Figura 1. Evolución de la Dependencia de las Importaciones de Alimentos, Cuba 1980-2013**

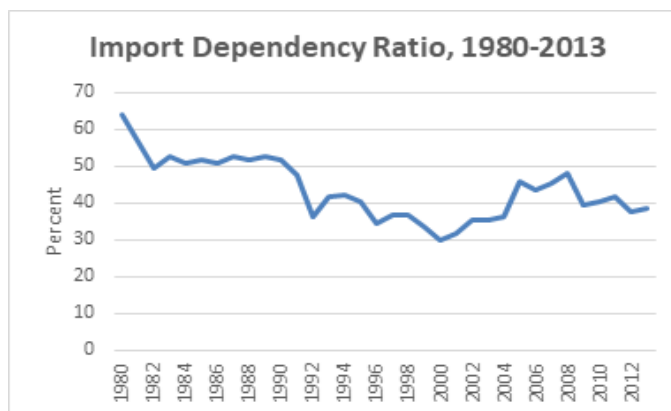

*Esta gráfica ilustra la Relación de Dependencia de Importaciones del 1980-2013. Elaborada por los autores con datos de: FAOSTAT Food Balance Sheets, FAOSTAT Trade. Crops and Livestock 13.09.2017.*

Al igual que muchas otras naciones insulares, Cuba ha importado históricamente una gran parte de sus alimentos, en gran medida debido a su larga historia de tener una economía agraria basada en un grupo pequeño de monocultivos para la exportación (Figueroa-Albelo, 2005; Schultz, 2012; García-Álvarez y Nova-González, 2014). Aunque el gobierno cubano oficialmente promueve la sustitución de importaciones de alimentos<sup>5</sup> y algunas políticas han sido implementadas, se necesitan reformas más comprehensivas en materia de precios, impuestos, tasas monetarias y de cambio, además de inversiones para fomentar la producción agropecuaria para el mercado doméstico (García-Álvarez y Nova-González, 2014; Spoor y Thiemann, 2016). La disminución de la dependencia de las importaciones de alimentos ocurrida en los 90 es un reflejo más cercano de la situación económica del estado cubano y su capacidad de la compra con divisas, que un reflejo de los logros de la producción doméstica o agroecológica.

Una mirada más cercana a la composición de las importaciones de alimentos de Cuba, muestra un predominio de alimentos provistos por el sistema de racionamiento (arroz, carne de ave, productos derivados del trigo como el pan, leche y aceite de cocina), lo que respalda la afirmación de que el 84% de los alimentos de la libreta son importados (Figura 2). Los rubros importados tienden a representar cultivos que no se producen con eficiencia en Cuba. De ahí, por ejemplo, que la dependencia de las importaciones de trigo y otros cereales probablemente se mantendrá alta y no será afectada por los esfuerzos agroecológicos o agrícolas en general. No obstante, la sustitución de importaciones de arroz, aceite de cocina y carne de ave está siendo abordada por programas piloto, como el de “arroz popular” (Socorro y Sánchez, 2016).

<sup>5</sup> Ver PCC, 2011. *Lineamientos de la política económica y Social del Partido y la Revolución*, Partido Comunista de Cuba, La Habana, y PCC, 2016. *Actualización de los Lineamientos de la política económica y social del Partido y la Revolución para el periodo 2016-2021*, Partido Comunista de Cuba, La Habana.

**Figura 2. Importación de productos agropecuarios, Cuba, 2015**

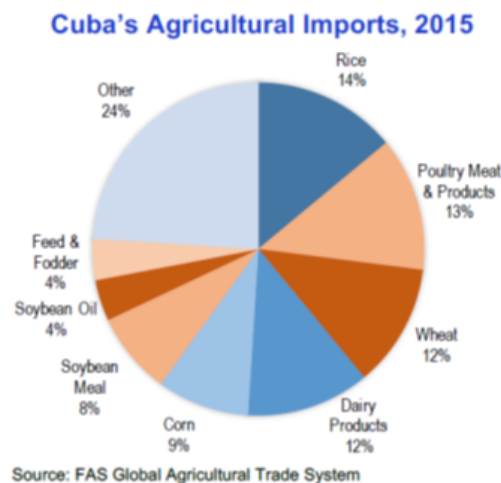

*Leyenda: Esta figura muestra la distribución de los tipos de importaciones agropecuarios por porcentaje.*

### **3.2 Producción nacional y rendimientos**

Aunque el sector agropecuario cubano fue devastado por la caída del Bloque Socialista, la producción y los rendimientos de algunos rubros clave ya estaban decreciendo antes de la crisis de los 1990. Aún con extensas inversiones, el alto uso de fertilizantes y abundantes tractores, se registraron disminuciones en la producción y la pérdida de eficiencia desde mediados de los 80 (Nova González, 1994; Álvarez y Messina, 1996). Algunos agrónomos cubanos ya estaban conscientes de esta tendencia y del eventual impacto negativo sobre la producción, la salud y el medio ambiente del sistema convencional de altos insumos. Estos agrónomos comenzaron a buscar y promover enfoques agrícolas más holísticos. Las condiciones del Período Especial abrieron el espacio político y económico para permitir que las formas alternativas de agricultura se arraigaran. Como muestran los datos en la Figura 3, se han logrado avances significativos en los niveles de producción de viandas, hortalizas y frijoles. Machín et al. (2010) muestran resultados similares con los crecimientos en la producción de viandas, hortalizas y frijoles, a pesar de la reducción en el uso de fertilizantes y plaguicidas, lo que sugiere que las prácticas agroecológicas de bajos insumos han contribuido a los incrementos de la producción.

**Figura 3. Producción Total Nacional para Cultivos Claves, Productos Cárnicos y Lácteos**

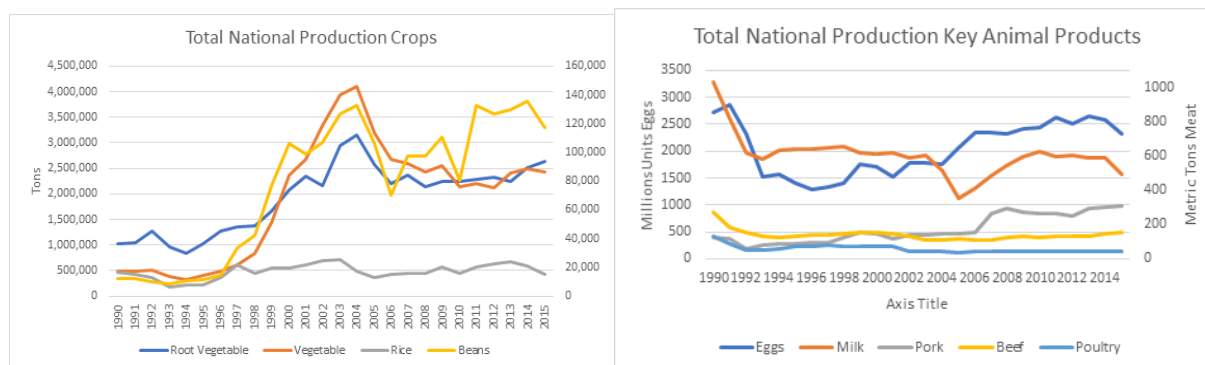

*Estas gráficas muestran los cambios en los niveles de producción para cultivos claves, productos cárnicos y lácteos entre 1990 y 2014. Elaboradas por autores con datos de la ONEI 2011.*

La producción de carne de res y ave se redujo ligeramente en los primeros años del Período Especial y luego ha crecido tímidamente, en general permanece estancada. Con una cantidad significativa del pollo siendo importada, hay pocos incentivos para invertir en aumentar esta producción. La producción de leche cayó más fuertemente y no se ha recuperado. El profundo trauma al sector ganadero no puede negarse. Miles de cabezas de ganado para producción de leche y carne murieron a principios de los 1990 y el reemplazo de los rebaños es lento. Sin embargo, ha habido muchos ejemplos localmente exitosos de la implementación de sistemas agrosilvopastoriles y la cría de razas más resistentes (Funes-Monzote, 2008). Liderando estas investigaciones están la Estación Experimental de Pastos y Forrajes 'Indio Hatuey' y el Instituto de Ciencia Animal. La producción porcina, la fuente preferida de proteínas para la población cubana, ha experimentado un incremento en años recientes.

Como se mencionó anteriormente, la agroecología fue integrada al sistema alimentario cubano a través de reformas y proyectos que afectaron profundamente al sector no estatal. Este último no solo ha estado a la vanguardia de la defensa de la agroecología en Cuba desde el Período Especial, sino que las fincas pequeñas de familias campesinas, en particular, han llegado a producir más del 65% de la producción nacional de alimentos en tan solo el 35% de la superficie agrícola del país (Casimiro, et al., 2017; Rosset, et al., 2011; Shultz, 2012; Grogg, 2007). Los datos en los artículos de Álvarez y Messina (1996) y García-Álvarez y Nova-González (2014) apuntan también a que las cooperativas, y en general el sector no estatal tiene niveles relativamente más altos de productividad. Como muestra la Figura 4, el sector no estatal ha venido produciendo un porcentaje cada vez mayor de la oferta nacional de alimentos desde el Período Especial. Para alimentos clave como hortalizas, viandas, arroz, frijol y leche, las cifras están por encima del 80%, no siendo así en la producción de huevos. Por otra parte, la producción de carne de res, puerco y ave aún está dominada por el sector estatal, aunque ha habido un crecimiento significativo en la producción no estatal de res desde el 2009.

**Figura 4. Sector No Estatal, % de la Producción Nacional de Alimentos Clave, Carne y Lácteos**

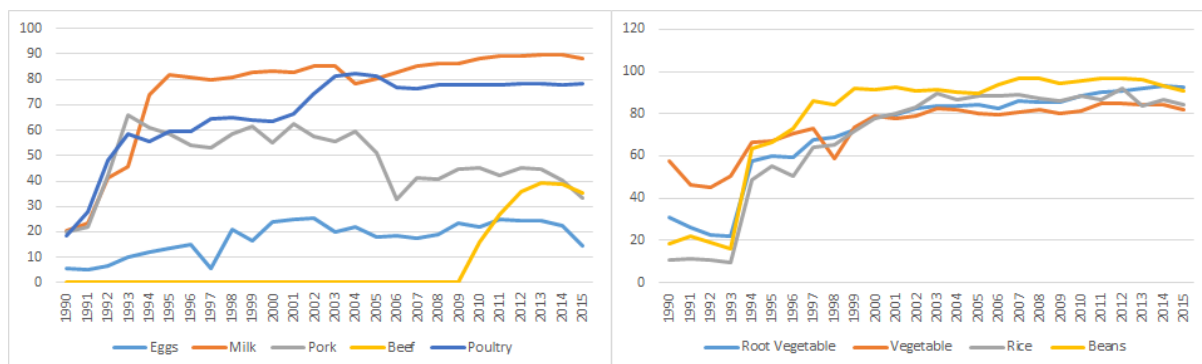

*Estas gráficas muestran el % de producción nacional para rubros clave, carnes y lácteos que viene del sector no estatal (cooperativas y fincas privadas). Elaborado por los autores con datos de ONEI 2011.*

Es lógico que la contribución del sector no estatal a la producción nacional haya crecido con los años en correspondencia con la redistribución progresiva de tierra de la gestión estatal a la no estatal. Si consideramos los incrementos de la producción nacional de ciertos cultivos y que el mayor porcentaje de esta producción proviene de cooperativas (y en menor medida de agricultores independientes), podemos asumir que la agricultura de pequeña escala, agroecológica y de bajos insumos ha contribuido positivamente a la recuperación de la producción de alimentos en Cuba. También es razonable pensar que la producción nacional de muchos cultivos ha aumentado ya que el área de tierra dedicada a ellos ha aumentado. Por eso, es importante tener en cuenta no solo la producción sino también los rendimientos.

La figura 5 muestra el cambio en los rendimientos para rubros clave entre 1985, el momento en que se registraron algunos de los rendimientos más altos en el periodo anterior a la crisis, y 2016. La figura muestra que, en todos cultivos, ha habido un incremento en el rendimiento desde 1985, con las hortalizas, boniato (batata), maíz y frijoles mostrando los incrementos más significativos.

**Figura 6. Cambios en los rendimientos (kg/ha) de 1985 y 2016 para cultivos clave, Cuba**

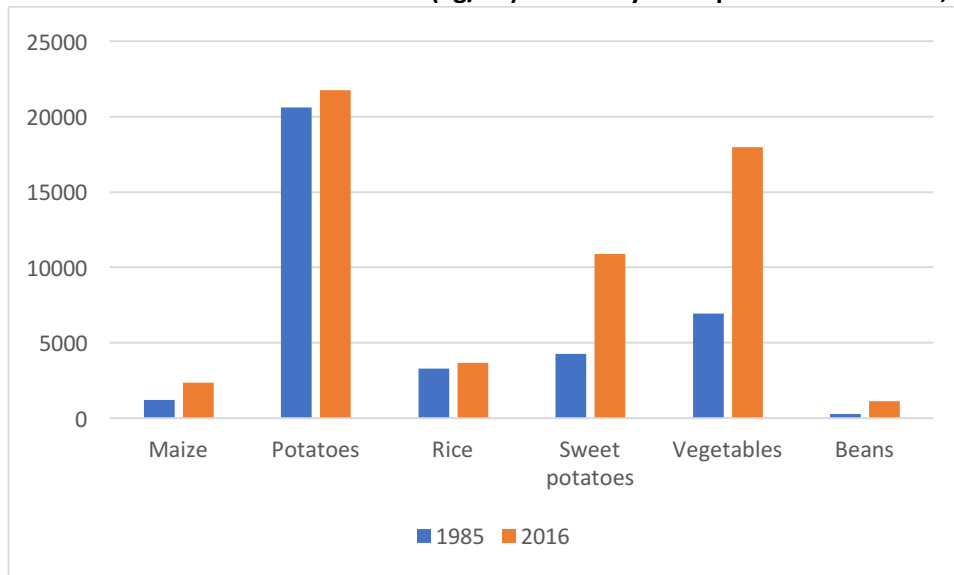

*Esta figura muestra el promedio de rendimientos para el sector estatal y no-estatal agregado. Datos provienen de la ONEI.*

Si bien la información hasta ahora presentada refleja los datos oficiales, vale destacar el importante papel de la producción de alimentos no registrada para la seguridad alimentaria. Esta contiene tanto la producción para el consumo doméstico como las ventas de alimentos en el mercado no regulado. La producción para el consumo doméstico, en áreas urbanas y rurales, se realiza en solares, patios e incluso techos. La producción en estos espacios a menudo no forma parte de la estadística oficial, sin embargo, contribuye significativamente a la dieta diaria de muchos cubanos (Buchmann, 2009). En adición, hay volúmenes importantes de alimentos que se venden en el mercado negro, a veces como resultado las fallas de Acopio en la recolección de las cosechas, otras veces como resultado del interés de los agricultores en obtener mayores beneficios económicos usualmente encontrados en el mercado no regulado.

### **3.3 Seguridad Alimentaria**

Las cifras de producción e importación de alimentos solo nos muestran la disponibilidad de alimentos. No dicen nada acerca de los otros tres aspectos claves de la seguridad alimentaria, a saber, acceso, utilización y estabilidad, que a menudo son los obstáculos mayores, ya que están vinculados a problemas sistémicos más profundos de pobreza y desigualdad y problemas económicos estructurales. A pesar de cierta recuperación en los niveles de producción de alimentos que forman parte de la canasta básica, hacer llegar la comida a la mesa es una lucha cotidiana para la familia cubana promedio. Esto tiene menos que ver con asuntos de productividad que con el poder adquisitivo, el desperdicio de alimentos, los sistemas ineficientes de distribución y comercialización, la doble moneda y un sistema tributario que incentiva un modelo de distribución basado en las importaciones, en lugar de un modelo de distribución doméstico (Spoor y Thieman, 2016). A pesar de los desafíos para procurar alimentos, el compromiso sostenido de Cuba con el sistema de racionamiento, la libreta, aunque sus provisiones han bajado con los años, provee un colchón de seguridad para una buena parte de la población y ha sido esencial para prevenir los niveles de hambre extrema y la malnutrición observados en otras partes de América. La figura 6 muestra que el consumo de carbohidratos está por encima de los niveles recomendados, fluctuando alrededor del 130%. A pesar de una recuperación en el consumo promedio de kilocalorías, esto no es un indicio de seguridad nutricional. Hay problemas con anemia y otras deficiencias micro nutritivas en la isla. La disponibilidad de proteína, aunque aún no suficiente, ha incrementado desde finales de los 90, casi llegando al 100%.

**Figura 6. Disponibilidad de energía calórica y proteína, Cuba 1999-2013**

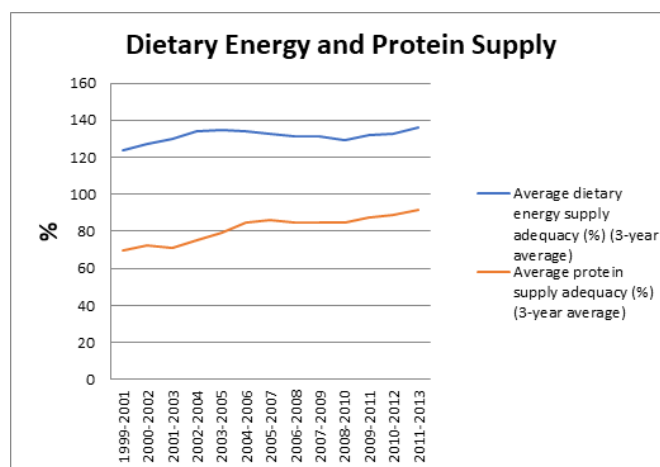

*Leyenda: Esta gráfica muestra la adecuación promedio del suministro de carbohidratos y proteínas del 1999 al 2013. Fuente: FAO 2016.*

### 3.4 Soberanía Alimentaria

El concepto de soberanía alimentaria está vinculado a movimientos de base crecientes, dinámicos, y al activismo académico; su análisis, complejo y lleno de matices, está más allá del alcance de este artículo. Sin embargo, nos parece importante incluir una breve sección sobre este tema por el papel prominente de Cuba, práctico y teórico, en la construcción de la soberanía alimentaria y por el papel fundamental de la agroecología en el mismo sentido. La soberanía alimentaria, en esencia, intenta impulsar una agenda más progresista para la alimentación y la agricultura a nivel global. Esta visión es una respuesta directa a las limitaciones del concepto de la seguridad alimentaria: en pocas palabras, la seguridad alimentaria no tiene en cuenta cómo se producen los alimentos, quién los produce, de dónde vienen o si se alinea con las decisiones de un individuo, la comunidad o la nación sobre el qué, quién, dónde y cómo de la producción, distribución y consumo de alimentos. Nacida de los movimientos campesinos que protestan por los impactos económicos, sociales y ambientales del sistema neoliberal de libre comercio, la soberanía alimentaria es fundamentalmente un concepto político que busca vincular las acciones progresistas locales con una agenda política más amplia, para realizar cambios estructurales en los sistemas agroalimentarios locales y globales (Schiavoni, 2016). El concepto de soberanía alimentaria fue acuñado en una reunión de La Vía Campesina a medianos de los 90. Aunque el término tiene raíces en movimientos mexicanos (Edelman, 2014), su definición está en constante evolución a través de un proceso iterativo que refleja el dinamismo del movimiento. En el primer foro global de soberanía alimentaria, realizado en Nyéléni, Mali, en 2007, se acordó la siguiente definición de soberanía alimentaria: “el derecho de los pueblos a alimentos nutritivos y culturalmente adecuados, accesibles, producidos de forma sostenible y ecológica, y su derecho a decidir su propio sistema alimentario y productivo. Esto pone a aquellos que producen, distribuyen y consumen alimentos en el corazón de los sistemas y políticas alimentarias, por encima de las exigencias de los mercados y de las empresas”. Algunos de los puntos clave apoyados por miembros del movimiento de soberanía alimentaria incluyen: el derecho a la alimentación para todos, la relocalización de los sistemas alimentarios, el derecho a los recursos productivos, la igualdad de género,

la protección contra el 'dumping', la protección contra el acaparamiento y usurpación de tierras y la promoción de agroecología como fundamental para lograr la soberanía alimentaria. Los principios de agroecología complementan las metas de la soberanía alimentaria, ya que la agroecología rompe con la dependencia de insumos externos al aprovechar los diversos servicios agroecosistémicos para el control plagas, la salud del suelo, la productividad de la tierra, la diversidad nutricional, entre otras metas. Además, la agroecología utiliza enfoques transdisciplinarios, participativos y orientados hacia la acción para construir sistemas agroalimentarios sostenibles, todos principios alineados con la soberanía alimentaria.

Una diversidad de actores, cada vez más amplia, está prestando atención al paradigma de la agroecología para la soberanía alimentaria, ya que estamos ante una crisis múltiple causada en parte por el actual sistema agroalimentario global (la crisis alimentaria, el cambio climático, la pérdida de biodiversidad, la pobreza y el hambre). La crisis alimentaria de 2008 despertó el interés de algunos gobiernos, particularmente en el Sur Global, por el concepto de la soberanía alimentaria, ya que ven en el reequilibrio de las importaciones y exportaciones de productos básicos agrícolas y alimentos la estrategia necesaria para reducir su vulnerabilidad a la volatilidad de los mercados y al cambio ambiental global. La FAO ha reconocido el importante papel de la soberanía alimentaria al unirse en 2013 a La Vía Campesina en la promoción de los pequeños agricultores como agentes clave para la erradicación del hambre en el mundo (FAO, 2013). Las organizaciones no gubernamentales están promoviendo cada vez más la soberanía en vez de seguridad alimentaria debido a su énfasis en los derechos de los campesinos y de la naturaleza, y en el cambio estructural. Los académicos también han estudiado los movimientos de soberanía alimentaria y utilizan el concepto como marco analítico para entender los sistemas agroalimentarios (Pimbert, 2008; Patel, 2009; Wittman, 2011). Las alianzas estratégicas entre distintos actores en diferentes regiones del mundo pueden contribuir al escalonamiento vertical y horizontal de la soberanía alimentaria.

Agroecólogos cubanos que han estado a la vanguardia de la promoción de un modelo alternativo a la agricultura convencional, desde los orígenes del movimiento orgánico y la agricultura urbana, reconocen que la agroecología es la base de la soberanía alimentaria (Funes-Aguilar, 2001; Monzote, et al., 2001; Machín-Sosa, et al., 2013; Funes-Aguilar, 2016; Caballero-Grande, et al., 2016; Caballero-Grande, et al., 2000; Vázquez-Moreno & Niurlys-González, et al., 2017; Simon-Reardon, et al., 2010; Casimiro-Rodríguez, 2016). El miembro institucional de La Vía Campesina en Cuba, la ANAP, con una membrecía de más de 380,000 productores, ha hecho una declaración explícita en este sentido, a través de la adopción de la perspectiva agroecológica como visión y dirección estratégica, enfatizando el modelo agroecológico como un paso hacia la soberanía alimentaria (ANAP, 2015; ANAP, 2016; Machín-Sosa, et al., 2010; Simon-Reardon, et al., 2010). De manera similar, el Programa Nacional de Agricultura Urbana, Suburbana y Familiar, presente en todos los municipios del país, enraíza el concepto de la soberanía alimentaria (Rodríguez-Nodals, et al., 2006; Companioni, et al., 2016; INIFAT, 2016).

Desde una perspectiva dialéctica e histórica, el proceso de hacer la soberanía alimentaria una realidad no está exento de contradicciones y luchas, internas y externas, y las metas siguen moviéndose y

transformándose (Edelman, et al., 2014; Schiavoni, 2016). Hay tres caminos potenciales que Cuba pudiera tomar: uno sería el de redoblar su compromiso con un modo alternativo de relaciones productivas basadas en la agroecología y la soberanía alimentaria; un segundo camino sería abarcar y combinar dos modelos en competencia (convencional y agroecológico); un tercer camino sería profundizar y expandir el modo convencional e industrializado de los países capitalistas. El modelo actual agroindustrial incluido en los lineamientos del PCC implícitamente fomenta el desarrollo de un modelo combinado (PCC, 2011; PCC, 2017). Además, dada la presencia de organismos genéticamente modificados (OGM) en el mercado internacional y la industria biotecnológica de Cuba, el asunto crítico de la producción y diseminación de transgénicos y su significado para el avance de agroecología y soberanía alimentaria, siguen debatiéndose (Funes-Monzote, 2009; Altieri y Funes-Monzote, 2012).

El avance hacia la soberanía alimentaria basada en la visión agroecológica en Cuba, como en cualquier otro país, implica un cambio en las relaciones políticas, sociales, económicas y ecológicas. Este cambio no está aislado de las influencias externas. En este sentido, los esfuerzos de Cuba para lograr las condiciones que permitan la soberanía alimentaria son, por un lado, obstaculizados por el efecto del bloqueo económico y financiero estadounidense (Dávalos-Fernández, 2012), pero por otro lado, son facilitados por el efecto del mismo bloqueo de proteger a Cuba de la incursión de agricultura capitalista y el régimen alimentario corporativo. De igual modo, han sido afectados por las decisiones económicas y políticas y la voluntad de líderes cubanos de invertir, promover e implementar un modelo de desarrollo sobre la base de la investigación, el conocimiento y la experiencia ganada desde el Período Especial para construir un camino alternativo.

Además, el desarrollo de la soberanía alimentaria basada en el paradigma agroecológico requiere la reorganización del comercio a los niveles local, nacional e internacional, de tal manera que se promueva y proteja la economía local y nacional, como han hecho economías desarrolladas en el pasado (Moyo, et al., 2013; Amin, 1976). A medida que Cuba continúa ‘actualizando’ su modelo social y económico, con énfasis en la sustitución de importaciones, hay oportunidades para desarrollar nuevos tipos de modelos comerciales que respeten los principios de la soberanía alimentaria.

#### **4. Cambiando las Relaciones y Políticas Agroalimentarias**

Antes de la Revolución, el sistema agroalimentario cubano estaba altamente determinado por sus relaciones con Estados Unidos; inversionistas estadounidenses poseían grandes extensiones de tierra, donde producían principalmente azúcar, y alrededor de la mitad de la dieta cubana diaria provenía de alimentos importados, el 75% de los cuales se importaba directamente de los Estados Unidos (Nova González, 2012). Cuando el gobierno revolucionario confiscó la tierra de los propietarios estadounidenses y lanzó una campaña para diversificar tanto la tenencia como la producción agrícola, los Estados Unidos tomaron represalias y cortaron la cuota azucarera cubana. A partir de ese momento, la política estadounidense hacia Cuba se ha caracterizado por el aislamiento y la agresión, en un intento por

desmantelar el gobierno de Castro y la Revolución Cubana. Debido a los esfuerzos de Estados Unidos por limitar el comercio de Cuba con otros países, su proximidad geográfica y los nexos familiares cercanos entre muchos ciudadanos cubanos y estadounidenses, los Estados Unidos juegan un papel enorme que afecta no solamente a los sistemas agrícolas cubanos, sino su economía y sociedad en general.

El comercio EEUU-Cuba post-Revolución no existió hasta el 28 de octubre de 2000, cuando el presidente Bill Clinton firmó la Ley de Reforma a las Sanciones Económicas y Mejoramiento de las Exportaciones (Trade Sanctions Reform and Export Enhancement ACT), o TSRA. Por primera vez en décadas, la TSRA permitía a las empresas estadounidenses vender alimentos y productos agrícolas a Cuba. El gobierno cubano dudó en participar, hasta que el huracán Michelle golpeó el país en octubre de 2001 devastando a la producción agrícola de la isla. El diciembre de 2001, Cuba hizo su primera compra de productos agrícolas de Estados Unidos para llenar la brecha producida por el paso del huracán (Álvarez, 2004). Las compras a Estados Unidos crecieron de forma sostenida y, entre 2003 y 2012, Estados Unidos fue el proveedor número uno o número dos de productos agrícolas a Cuba, antes de caer al quinto lugar después de que la Unión Europea, Brasil, Argentina y Vietnam ofrecieron mejores opciones de financiamiento, a pesar de su distancia geográfica (EngageCuba, 2016).

Desde el 2000, el agronegocio estadounidense, su lobby, y representantes de estados agrícolas, han estado involucrados de forma itinerante en los esfuerzos por aflojar las restricciones al comercio con Cuba. Además de fomentar el fin del embargo económico, han presionado para cambiar la TSRA, que no permite la compra a través de créditos y solo permite intercambios en efectivo, así empujando a Cuba a comprar de otros países. En diciembre 2014, el anuncio de los presidentes Castro y Obama sobre la normalización de las relaciones creó un ambiente político fértil para incrementar la presión por el cambio en ámbito de las relaciones agroalimentarias; incluso el fin del bloqueo parecía posible. En esta sección, perfilamos los cambios políticos que se han llevado a cabo desde el fin del 2014 antes de analizar sus repercusiones para el movimiento agroecológico cubano en la sección posterior.

#### ***4.1 Cambios bajo el Gobierno de Obama***

Después de las declaraciones en diciembre de 2014, se llevaron a cabo varios cambios relevantes en la política con impacto en el sistema alimentario cubano y los compromisos EEUU-Cuba en las áreas de comercio, turismo, remesas y cooperación. En febrero del 2015, el Departamento de Estado de EEUU publicó un listado de bienes y servicios cubanos que podrían importarse a los Estados Unidos. Se estipulaba que estos debían provenir de ‘emprendedores cubanos independientes’, en lugar del estado cubano. Al año siguiente, la lista fue enmendada para incluir café cubano producido por pequeños agricultores.

En marzo del 2016, el Ministerio de Agricultura (MINAG) cubano y el Departamento de Agricultura (USDA) estadounidense firmaron un memorando de entendimiento para la cooperación bilateral en áreas que incluyen la sanidad vegetal y animal, la producción orgánica, la agricultura climáticamente inteligente, la conservación de suelos y bosques y el riego agrícola (USDA y MINAG, 2016). A esto le siguió en 2017 un memorando de entendimiento más detallado sobre sanidad animal y vegetal que sienta las bases para la cooperación en investigación y normas, y para la protección de los sistemas agrícolas de ambos países en caso de transacciones comerciales (USDA y MINAG, 2017). Aunque el entonces Secretario de Agricultura Tom Vilsak, indicó que ese acuerdo está en gran medida motivado por el interés de expandir los mercados

estadounidenses en Cuba, el memorando de entendimiento también deja abierto el espacio para un mayor intercambio académico en temas agropecuarios (Vilsak, 2016).

Bajo el gobierno de Obama, el Departamento de Estado también flexibilizó las restricciones a las remesas y los viajes a Cuba, lo que inyectó capital y aumentó la demanda del sector de pequeñas empresas en Cuba. Se estima que las remesas han proveído hasta un 70 por ciento de las inversiones de capital que han sido realizadas en el creciente sector 'cuentapropista' o de pequeños negocios particulares (Henken, 2017). Mucho de este sector consiste en hostales o 'casas particulares' y restaurantes, ambos inexorablemente vinculados al sistema agroalimentario cubano debido a sus necesidades de compra de alimentos. Adicionalmente, la flexibilización de las restricciones de viaje a Cuba bajo Obama, atrajo un flujo de turistas en 2015 y 2016, tanto de ciudadanos estadounidenses como visitantes de otros países que se apresuraron a ver a Cuba "antes de que la arruinaran los americanos", que levantó la cifra total de turistas a la cantidad inédita de 4 millones en 2016 y exigió más de los pequeños negocios y del suministro de alimentos (Felipe Gonzalez, 2016; Ahmed, 2016).

El agronegocio estadounidense fue rápido en impulsar oportunidades para aprovechar los cambios en la política ejecutiva y el creciente mercado cubano. En enero del 2015, solo un mes después de la declaración de los presidentes, un ejecutivo de Cargill fundó la Coalición de Agricultura de los Estados Unidos para Cuba (US Agriculture Coalition for Cuba—USACC), una asociación de agronegocios y asociaciones mercantiles que trabaja por "levantar el embargo con el fin de liberalizar el comercio y la inversión y reestablecer a Cuba como mercado para los productos estadounidenses" (USACC, 2016). Esta organización ha apoyado a una coalición bipartidista de políticos que han presentado una legislación que daría a las empresas agropecuarias norteamericanas un mayor acceso a los mercados cubanos.

Hasta ahora, las legislaciones propuestas han tomado dos carriles: ajustar la TSRA y poner fin al embargo. En enero de 2017, el representante Crawford presentó la H.R. 525, "Ley de Exportaciones Agrícolas a Cuba" (Cuba Agricultural Exports Act) que enmendaría la TSRA para permitir a los productores otorgar créditos a Cuba para la compra de productos agrícolas. Esta propuesta de ley sigue a una que Crawford introdujo en 2015 que nunca llegó a votación. En febrero de 2017, los senadores Heitkamp y Boozman presentaron un proyecto de ley complementario en el Senado, la S. 275, "Ley Expansión de Exportaciones Agrícolas" (Agricultural Export Expansion Act). En el momento de redactar este artículo, ambas propuestas de legislación han ganado apoyo bipartidista, pero ninguna ha llegado a votación.

La Ley de Comercio Cubano (Cuban Trade Act) es significativamente más ambiciosa que las propuestas de reforma a la TSRA. La propuesta H.R. 442, presentada en enero de 2017 por los representantes Emmer y Castor, y la S. 472 presentada en febrero de 2017 por el senador Moran, terminarían efectivamente con el embargo al anular secciones importantes de la Ley de Democracia Cubana (Cuban Democracy Act) de 1992, la Ley de Libertad y Solidaridad Democrática para Cuba (Cuban Liberty and Democratic Solidarity Act) de 1996 y la Ley de Reforma a las Sanciones Comerciales y Mejora de las Exportaciones (Trade Sanctions Reform and Export Enhancement Act) de 2000, al mismo tiempo que derogarían el bloqueo tal como fue promulgado a través de la Ley de Asistencia Extranjera (Foreign Assistance Act) de 1961. En el momento de redactar este artículo, la propuesta había obtenido siete patrocinadores adicionales en la Cámara de Representantes, pero ninguno en el Senado.

Si bien USACC y sus aliados en el Congreso se han enfocado particularmente en las oportunidades de mercado como centro de la descongelación, otra coalición (que incluye a autores de este artículo) fue fundada en 2015 para fomentar el compromiso mutuo alrededor del conocimiento agrícola y la construcción de movimientos. La Red de Agroecología Cuba-Estados Unidos (Cuba-US Agroecology Network—CUSAN) tiene la misión de “conectar a las personas, instituciones y movimientos en Cuba y Estados Unidos que se dedican a la construcción de sistemas agro-alimentarios ecológicamente resilientes, socialmente justos y económicamente equitativos”.

#### **4.2 Cambios dentro de Cuba**

Aunque los cambios en las políticas estadounidenses tienen fuertes implicaciones para Cuba, la relación no está guiada sólo por los EEUU, sino por las acciones paralelas tomadas por el estado cubano. En 2015, el Ministerio de Comercio Exterior (MINCEX) publicó su Portafolio anual de Oportunidades para la Inversión Extranjera, que establece pautas muy específicas para los convenios económicos y muestra la intención por parte del estado cubano de controlar cuidadosamente las aperturas comerciales. Estas pautas otorgan nuevos incentivos fiscales para las empresas mixtas de entidades extranjeras con cooperativas cubanas, pero no permiten la transferencia de propiedad de la tierra a las entidades extranjeras. Como plantea el MINCEX, “la nueva ley de inversión extranjera no busca vender el país o regalar el patrimonio nacional y la tierra. Busca fortalecer el crecimiento económico nacional con respeto a los principios socialistas y nuestras proyecciones sobre el proceso de actualización de nuestra economía” (MINCEX, 2016). Esta posición es importante para mantener un contexto donde la agroecología puede expandir y las metas de la soberanía alimentaria se pueden avanzar. Aunque la agricultura industrial tenga una presencia fuerte en Cuba bajo el modelo socialista, la incapacidad de los mercados extranjeros de mercantilizar la tierra cubana es clave para frenar la agricultura capitalista.

Aunque el Portafolio representa un área de fuerte control centralizado, la expansión de pequeños negocios indica un grado de descentralización en la economía cubana. La expansión en el turismo y el aumento de las remesas han coincidido con cambios en las políticas domésticas en Cuba que han autorizado cada vez más casas particulares y ‘paladares’ o restaurantes desde el 2011<sup>6</sup>, lo que, como se menciona arriba, tiene un impacto significativo en el sistema agroalimentario cubano. Estos impactos se discutirán más a fondo en la sección 5.

#### **4.3 Cambios bajo el Gobierno de Trump**

Aún antes de tomar posesión, el presidente Trump declaró que buscaría un “mejor trato” con Cuba que el gobierno anterior, alineándose con los partidarios de la línea dura anti-Castro. No obstante, muchas de las aperturas creadas bajo el gobierno de Obama continúan en pie. Las legislaciones introducidas, los tratados comerciales y de inversión que comenzaban a discutirse, los planes de intercambio bilateral que fueron hechos antes de que Trump asumiera el cargo, siguen siendo considerados, negociados e implementados. Similar al gobierno de Obama, la administración de Trump también busca ampliar las oportunidades para los negocios estadounidenses.

---

<sup>6</sup> En septiembre 2017, Cuba dejó de emitir nuevas licencias para estos negocios. No está claro cuándo se comenzarán a emitirse nuevamente.

Sin embargo, en junio de 2017, el presidente Trump declaró que cambiaría las políticas de Obama. Estos cambios fueron oficialmente publicados y entraron en vigor en noviembre del mismo año. Bajo estas políticas, cualquier compromiso importante de negocios o viaje planeado antes de estos cambios pueden proceder, sin embargo, se prohíbe toda nueva cooperación con entidades vinculadas con las fuerzas armadas cubanas, incluyendo ciertas cadenas hoteleras. En adición, los viajes individuales de intercambio de tipo “educativo pueblo-a-pueblo”, un pretexto legal que añadió Obama para que los ciudadanos norteamericanos pudieran visitar Cuba independientemente, han sido cancelados.

Quizás más significativamente, en octubre 2017, después de que se filtrara a la prensa información sobre misteriosos “incidentes acústicos” y dolencias experimentadas por el personal diplomático estadounidense en Cuba, el Departamento de Estado de EEUU anunció que se reducirían las operaciones en la embajada estadounidense en La Habana y que no se otorgarían más visas para cubanos, deteniendo abruptamente muchas visitas de académicos, agricultores y organizaciones no gubernamentales a Estados Unidos. Aunque el canciller cubano Bruno Rodríguez declaró que “no hay evidencia de que se haya producido un ataque acústico” el Departamento de Estado también publicó un aviso de seguridad para viajeros sin peso legal que recomienda no viajar a Cuba. Aunque individuos y organizaciones pueden escoger ignorar el aviso, el mismo restringe a muchas universidades públicas y agencias científicas, sobre todo las que tienen políticas internas de minimizar riesgos, de poder enviar a estudiantes, investigadores u otros representantes a la isla, así debilitando las posibilidades de progresión de colaboraciones académicas y de investigación bilaterales.

#### **4.4 Arreglos Comerciales Iniciales 2015-2017**

A medida que las asociaciones y el lobby del agronegocio estadounidense continúan presionando para ampliar las oportunidades en Cuba, las exportaciones de EEUU a Cuba han continuado, incluida la donación de 20 toneladas métricas de arroz de la compañía Martin Rice de Missouri en 2016 (Ward, 2016). Adicionalmente, dos productos cubanos han logrado entrar en el mercado estadounidense, y empresas de maquinaria agrícola están compitiendo para establecerse en el mercado cubano.

En enero de 2017, un cargo de carbón cubano llegó a puerto de la Florida. Este carbón es un producto elaborado a partir de marabú (*Dichrostachys cinerea*), una planta invasiva que los agricultores cubanos deben limpiar de su tierra y que se puede convertir en una fuente limpia de combustible para asados y hornos de pizza (Vinik, 2017). El carbón fue el primer producto importado en llegar directamente de Cuba a Estados Unidos en medio siglo, aunque fue precedido por Nespresso en ser el primer producto cubano vendido en los Estados Unidos en ese momento. En 2016, Nestlé importó 16 toneladas de café cubano, que fueron trasladadas a través de una filial en Londres y después vendido en Estados Unidos bajo la marca Nespresso. Nestlé, una compañía suiza, que ha vendido helado y gaseosa en Cuba desde finales de los 90, ha anunciado planes de invertir más de \$60 millones en la Zona de Desarrollo Especial del Mariel en Cuba, donde se centrará en café, galletas y productos de cocina (Morales, 2017).

El acuerdo de Nespresso, y la adición correspondiente del café a la lista del Departamento de Estado de productos cubanos que podrían venderse en Estados Unidos produjo una pequeña controversia diplomática con la Asociación Nacional de Agricultores Pequeños (ANAP). La ANAP criticó al Departamento de Estado por anunciar que solo el café comprado directamente a pequeños productores,

y no al estado cubano, podría venderse a los Estados Unidos. En Cuba, una empresa estatal controla la distribución y exportación del café, por lo que bajo la ley cubana sería ilegal para un agricultor exportar directamente a un estado extranjero, por no mencionar que sería logísticamente imposible. La respuesta de la ANAP incluyó: “Los pequeños agricultores cubanos no le tememos a los cambios, siempre que sean impulsados por nosotros mismos. Por esa poderosa razón, la pretensión permanente del gobierno de los Estados Unidos de quebrantar la unidad del pueblo de Cuba no puede permitirse, porque destruiría un proceso revolucionario que nos ha brindado democracia participativa, libertad, soberanía e independencia” (Granma, 2016). La declaración destaca la dificultad de avanzar en las relaciones siempre que la línea oficial de Estados Unidos sea apoyar a los pequeños negocios, en oposición al estado, lo que es conflictivo con la política interna de Cuba.

En 2017, se anunciaron nuevos acuerdos con un impacto más claro para agricultores de gran escala estatales que para los pequeños agricultores. Dos gigantes de la maquinaria agrícola estadounidense, Caterpillar y John Deere, anunciaron que venderían sus productos a Cuba durante la Feria Internacional de Comercio en La Habana. John Deere tiene planes de entregar tractores e implementos asociados a Cuba durante un período de cuatro años y Caterpillar ha recibido autorización para establecer una casa comercial en la Zona de Desarrollo Especial del Mariel (Miller, 2017). Estos anuncios llegaron un año después de que una empresa llamada Cleber, LLC, que produce un tractor llamado el Oggún, apropiado para la producción de pequeña escala, fuera rechazada de la zona especial, probablemente porque no se considera tecnológicamente avanzado o lo suficientemente grande como para ser adecuado para el proyecto de desarrollo (Whitefield, 2016). Irónicamente, a la vez que la nueva política de Trump busca restringir las transacciones con entidades estatales y las fuerzas armadas de Cuba, los tipos de tractores que estarán disponibles a través de John Deere y Caterpillar, si estos convenios proceden, estarán al servicio de la agricultura convencional de gran escala, que en Cuba se desarrolla típicamente bajo la gestión estatal con vínculos militares.

Aunque las políticas estadounidenses actuales, hasta julio de 2018, no prohíben los convenios comerciales en proceso, las acciones del gobierno de Trump han hecho que el estado cubano, a través del cual todos los convenios deben organizarse, muestre cautela al tratar con entidades estadounidenses. Además, la falta de capital y mecanismos financieros del estado cubano (problemas provocados por las sanciones de EEUU) dificultan los convenios internacionales. A pesar de eso, miembros del Congreso de ambos partidos políticos continúan abogando por un mayor comercio agrícola con Cuba. Mientras, gobernadores de estados graneros siguen visitando La Habana y representantes bipartidistas de Kansas (trigo), Minnesota (maíz, soya) y Arkansas (arroz) presionan para la HR 525, la Ley de Exportaciones Agropecuarias a Cuba. La matemática económica de la búsqueda capitalista de nuevos mercados puede vencer a los vestigios ideológicos del antagonismo capitalista con los gobiernos comunistas.

## **5. Oportunidades y Retos para el Movimiento Agroecológico de Cuba**

Hoy en día, el movimiento agroecológico cubano posee un gran potencial para seguir construyendo la sostenibilidad social y ambiental a lo largo de la isla. Casimiro et al. (2017) plantean que si fincas agroecológicas similares a la Finca del Medio, una finca agroecológica en la provincia de Sancti Spiritus, fueran replicadas en toda la superficie agrícola de Cuba, pequeños agricultores sostenibles podrían suplir las necesidades energéticas y proteicas de 8 millones de personas, más del 70% de la población cubana.

Si bien este hallazgo muestra el potencial de las técnicas agroecológicas tradicionales e innovadoras que han sido desarrolladas en Cuba, las condiciones macroeconómicas y barreras persistentes señalan desafíos para alcanzar esa meta.

Para que el modelo agroecológico se expanda en Cuba, el país tendría que reabordar la cuestión agraria y clarificar su compromiso con la soberanía alimentaria y el rol de las comunidades rurales y las fincas pequeñas en su futuro. Como descrito arriba, Cuba tiene políticas de usufructo extraordinarias que sirven para evitar la acumulación de propiedad privada, reducir la industrialización de las prácticas agrícolas y hacer que la tierra sea significativamente más accesible a los jóvenes y nuevos agricultores que en Estados Unidos o la mayoría de los países. Sin embargo, si la migración campo-ciudad no puede revertirse, aún con políticas progresistas de reforma agraria, la escasez de mano de obra puede lamentablemente abordarse a través de la industrialización del sector agropecuario.

Como han señalado académicos anteriormente, Cuba, particularmente en relación con Estados Unidos, sintetizó la cuestión agraria del siglo XX, de cómo el capitalismo captura, y sin embargo no logra captar, la agricultura campesina de pequeña escala (Graddy-Lovelace, 2016). Cuba, a principios del siglo XXI muestra la evolución de la cuestión agraria en sí misma: la cuestión cambió de una indagación sobre cómo y por qué la agricultura de pequeña escala sobrevive (y a la vez que se auto-explota) en el dominio agrocapitalista, a una indagación sobre cómo las prácticas agrarias agroecológicas son en sí mismas respuestas ante los desastres ecológicos de la agro-industrialización modernista, tanto en sus encarnaciones capitalistas como comunistas. Cuba demuestra cómo la cuestión agraria es ahora la respuesta agraria, o el ámbito de las diversas adaptaciones y regeneraciones agrarias ingeniosas que se desarrollan en sistemas agrarios mixtos, huertos, ferias de semilla, jardines y fincas urbanas a lo largo del país.

No obstante, las cifras oficiales revelan que menos de la mitad de la superficie agrícola está siendo cultivada, mientras que 883,900 hectáreas permanecen sin cultivar y 2.6 millones de hectáreas están caracterizadas como pastizales naturales (ONEI, 2017a). La población cubana sigue concentrada en áreas urbanas y sigue el proceso de éxodo continuo de jóvenes tanto del campo como del país. Con una población envejecida y bajas tasas de natalidad, es difícil encontrar nuevos agricultores dispuestos a trabajar la tierra. Algunos investigadores llaman a este desequilibrio entre áreas rurales y urbanas una fractura metabólica y argumentan que esto crea barreras culturales y económicas para la recampesinización (Clausen, et al. 2015).

Esto se ve agravado por la lucha prolongada de Cuba por resolver su sistema de doble moneda y su relación con los mercados internacionales. Actualmente, los trabajadores del estado y quienes trabajan en la economía doméstica ganan en pesos cubanos (CUP) que valen solamente 1/25 del valor de los pesos cubanos convertibles (CUC) (vinculados al dólar estadounidense) y que se generan en el sector de turismo, se utilizan para todas las transacciones internacionales y para comprar bienes producidos en el extranjero que tienen un precio según el mercado internacional. Aunque muchos agricultores pueden generar ingresos mayores que un empleado estatal típico, ganan menos que las personas trabajando en puestos vinculados con el turismo y los mercados extranjeros. Muchos jóvenes, al igual que muchos adultos, aspiran a tener empleos que les den acceso a los CUC, que son cada vez más importantes para lograr la seguridad material y necesarios para cualquier posible viaje o residencia temporal fuera del país.

Aunque el acercamiento con Estados Unidos está lejos de ser el único factor que impone desafíos sociales, culturales, económicos y políticos alrededor del sistema agroalimentario cubano, los desafíos actuales que plantea para el crecimiento económico y las trayectorias futuras que puede tomar bajo la normalización tendrán implicaciones mayores, positivas o negativas, sobre Cuba y la agroecología cubana. Como la historia de los tratados comerciales de Estados Unidos con México, Centroamérica y otros países notoriamente han mostrado, las exportaciones agrícolas estadounidenses pueden devastar las economías locales de alimentos, y forzar la consolidación e intensificación ambientalmente destructiva en estas áreas cuando los productores locales intentan competir (Wise, 2009a; Wise, 2009b; Daviron and Ponte, 2005; Bouët et al., 2005; Einarsson, 2000; Gonzalez, 2006). En esta sección, analizamos cómo los cambios en las políticas y relaciones (descritas en la sección 4), con respecto a los viajes, el comercio, la inversión extranjera directa, así como la investigación y la colaboración pueblo-a-pueblo, afectarán al movimiento agroecológico cubano. Se argumenta que, si bien una política de intercambios mutuos podría beneficiar a los sistemas agroalimentarios en ambos lados del estrecho, una política que gira estrictamente alrededor de la producción convencional y el comercio mercantil podría dañar el avance de la agroecología.

### **5.1 Viajes**

Como se indicó anteriormente, alimentar y entretener a los visitantes extranjeros ha colocado una carga mayor al sistema alimentario cubano. Las importaciones de alimentos han aumentado y los pequeños productores también han encontrado nuevos mercados para su producción. Aunque algunos comentaristas celebran la entrada económica o especulan que como los turistas buscan alimentos orgánicos eso podría apoyar a los campesinos agroecológicos; a otros les preocupa que el turismo desvíe los alimentos de los mercados nacionales a los turísticos, y entonces se requiera de la producción convencional para abastecer estos mercados y que esto provoque una creciente inequidad en el acceso a los alimentos. Tal como está hoy, gran parte de la compra de alimentos para hoteles se realiza a través de mercados que no compiten con la población cubana (alimentos importados o de producción nacional), y que pagan con la moneda nacional que ganan los agricultores que producen para los mercados domésticos. Este también es el caso de algunos restaurantes, pero muchos paladares de hecho compran en los mercados campesinos y supermercados donde compra la población cubana. Esta fracción del sector turístico puede tener un impacto en la disponibilidad de alimentos para la población nacional con el tiempo. Una porción mucho más pequeña de paladares, compra directamente a campesinos, pero debido a que estos agricultores están obligados a abastecer los mercados nacionales y las instituciones sociales locales, esta práctica nueva actualmente hace más para hacer factible la forma de vida agroecológica que para distorsionar los ingresos o desviar alimentos de los mercados domésticos.

### **5.2 Comercio**

Los agroecólogos Altieri y Funes-Monzote (2012) han escrito que históricamente los decisores en Cuba se mueven cíclicamente entre los paradigmas agroecológicos y convencionales; en tiempos de escasez material apoyan la agroecología y en épocas en que es económicamente posible importar alimentos o insumos químicos, una vez más se respalda la producción convencional. Esta perspectiva sugiere que el aumento de intercambio comercial con Estados Unidos, o con otros países, podría hacer que el gobierno cubano desestime la producción agroecológica y a los agricultores agroecológicos. En este escenario, las empresas norteamericanas podrían beneficiarse del aumento de las ventas a Cuba, pero los ciudadanos

cubanos, campesinos y el ambiente podrían eventualmente sufrir a largo plazo si el país regresara gradualmente al modelo que prioriza la producción industrial de cultivos para la exportación y alimentos baratos para la importación. Es poco probable que esto pasaría si el gobierno sigue priorizando la sustitución de importaciones de alimentos y se compromete con un modelo socioeconómico sostenible y próspero. Sin embargo, ciertos sectores, como la producción avícola, han decaído debido a su baja competitividad frente a las importaciones de Estados Unidos que comenzaron en 2001 (García Álvarez y Nova González, 2014).

No obstante, hay beneficios económicos claros para el incremento del comercio con Estados Unidos. Es probable que, en una situación de comercio abierto, Cuba mueva su fuente de importaciones de alimentos desde la Unión Europea, Brasil, Vietnam y China a Estados Unidos. Esto no significa un aumento en las importaciones, sino una sustitución de la fuente, que probablemente implicaría la compra de bienes similares a un precio menor, ya que se reduciría considerablemente el costo del envío. Esto también podría conllevar a menores gastos totales en las importaciones de alimentos, permitiendo así una mayor inversión en la producción nacional. Además, el fin del bloqueo y la expansión del comercio entre Estados Unidos y Cuba podría incrementar la disponibilidad de implementos agrícolas básicos que necesitan los pequeños productores, como equipos de riego, palas, carretillas, mallas para proteger cultivos y equipos para la preservación de alimentos a pequeña escala, por ejemplo, frascos y equipos de enlatados. Una mejor tecnología para la conservación de alimentos y mejores recursos materiales para apoyar la infraestructura para el almacenamiento y distribución local podría tener un gran impacto positivo en la seguridad alimentaria cubana, considerando el alto volumen de alimentos que se pierden en cosecha y poscosecha (Mundubat, 2017).

Además, un comercio de menor costo en ramas fuera de los alimentos y la alimentación (tanto con Estado Unidos o con otros países que están actualmente afectados por sanciones económicas estadounidenses) podría incrementar la seguridad económica en general de Cuba, y así teóricamente permitir que una mayor parte del presupuesto nacional se dedicara a los programas e instituciones locales, provinciales y nacionales que apoyan y proveen recursos necesarios a agricultores, o bien que se dirigiera a mejoras en la infraestructura local para la distribución y comercialización de alimentos agroecológicos.

Como se mencionó anteriormente, también existe una nueva oportunidad para que Cuba exporte productos agrícolas a Estados Unidos, sobre todo aquellos comercializados como agroecológicos u orgánicos. Poco tiempo después de que se firmara el primer memorando de entendimiento entre los departamentos de agricultura de EEUU y Cuba, la representante Chellie Pingree de Maine organizó un viaje de productores de alimentos orgánicos de Estados Unidos (incluyendo ejecutivos de Stoneyfield Farms, Honest Tea and Global Organics), con la misión de explorar oportunidades para que la industria de EEUU apoye al sector orgánico y de bajos insumos en Cuba, compre de este sector y lo anime a certificarse como orgánico.

Aunque estos esfuerzos han sido paralizados por la reticencia del gobierno cubano a proceder con este tipo de iniciativa, y el temor por parte de las empresas estadounidenses, vale la pena analizar esta posibilidad, ya que podría reemerger y presentar tanto una oportunidad para los agricultores cubanos como una posible preocupación para el mercado doméstico cubano. Si el estado decidiera desviar una

parte mayor de la oferta agrícola cubana hacia la certificación para exportación,<sup>7</sup> o bien permitir a los agricultores individuales una mayor autonomía para tomar estas decisiones individualmente, esto podría debilitar la disponibilidad nacional y asequibilidad de alimentos e incentivar a productores a sembrar para mercados extranjeros. Recursos valiosos, como agua dulce, podrían ser desviados para regar cultivos de exportación, lo que crearía problemas para la isla, ya que se prevé que las sequías serán un impacto clave del cambio climático en Cuba (Gonzalez, 2018). Además, la certificación de las fincas cubanas por agencias certificadoras extranjeras podría diluir los principios y prácticas que ya se implementan en Cuba, llevando a una menor diversidad biológica. Sin embargo, como argumentan Altieri, et al. (2011), “No hay nada de malo en que pequeños agricultores [cubanos] capturen una parte de los mercados de exportación, siempre y cuando esto no signifique descuidar sus roles como productores locales de alimentos”. El riesgo de un mercado de exportación orgánico neocolonial es bajo teniendo en cuenta el compromiso del gobierno de priorizar la sustitución de importaciones, así como su compromiso con las garantías sociales que aseguran un nivel mínimo de seguridad alimentaria para la población. Si el gobierno cubano sigue comprando alimentos locales directamente a campesinos para subsidiar alimentación en escuelas, hospitales y otras instituciones, entonces hay posibilidades para preservar la disponibilidad local de alimentos frescos y una compensación justa para los pequeños productores cuyo modelo productivo no es factible para los cultivos de exportación.

De hecho, la combinación de un sector agroecológico fuerte en Cuba y un interés creciente en la agricultura orgánica y diversificada en Estados Unidos podría representar una oportunidad única para establecer un nuevo tipo de relación comercial. En lugar de intercambios centrados en la producción de productos básicos, bajos salarios, trabajo marginalizado y daño a los sistemas alimentarios domésticos en ambos países, existe la oportunidad de perseguir relaciones centradas en los principios de la agroecología, el cooperativismo y la soberanía alimentaria. Por ejemplo, las cooperativas cubanas y estadounidenses podrían intercambiar productos que no pueden reproducir en sus ambientes respectivos o que están fuera de temporada. Las frutas tropicales y endulzantes podrían enviarse a Estados Unidos y cultivos de clima frío (granos, manzana, brocoli, remolacha, zanahoria) enviarse a Cuba sin socavar las industrias existentes en ambos países. Algunos productores cubanos han identificado “mercados solidarios” (mercados basados en la solidaridad) (Leslie, 2017) como un medio para apoyar los esfuerzos agroecológicos tanto en Cuba como en Estados Unidos al conectar directamente comunidades con principios sociales y ecológicos similares. Por ejemplo, la Federation of Southern Cooperatives de Estados Unidos ha mantenido una relación con la ANAP desde 1999 y ha explorado oportunidades para establecer acuerdos de comercio justo con sus cooperativas y agricultores. ¿Podrían las contrapartes estadounidense y cubana forjar y desarrollar nuevos modelos de comercio bajo nuevas reglas económicas? Si alguna vez hubo una oportunidad para desarrollar normas innovadoras de relaciones de capital y comercio, es hoy, mientras que las relaciones entre Cuba y Estados Unidos están en una montaña rusa camino a la normalización, la agricultura capitalista está globalmente en crisis y el cambio climático nos empuja a adaptarnos y a realizar transiciones más profundas hacia la resiliencia.

### **5.3 Inversión Extranjera Directa**

---

<sup>7</sup> Según Kilcher (2009), en 2008, 2954 fincas cubriendo 14,314 hectáreas, produciendo azúcar, cítrico, café, coco, mango o miel, fueron certificadas como orgánicas por agencias certificadoras extranjeras.

El estado cubano ha desarrollado una legislación para la inversión extranjera directa y desde el 2015, ha publicado un Portafolio de Oportunidades para la Inversión Extranjera. Si bien este ofrece nuevas oportunidades para el desarrollo económico en Cuba y mantiene la determinación del estado cubano sobre cómo ocurrirá el desarrollo; también existe la posibilidad de que pueda promover modelos percibidos como “modernos” y “tecnológicamente avanzados” al costo del medio ambiente y los pequeños agricultores cubanos. Esto se ve, por ejemplo, en la priorización de grandes compañías como Caterpillar sobre el pequeño tractor Oggún en la Zona de Desarrollo Especial del Mariel. Si las políticas ambientales de Cuba se aplican estrictamente, quizás esto no sea un riesgo. La Asamblea Nacional de Cuba aprobó en abril de 2017 una estrategia para el cambio climático, llamada Tarea Vida, que tiene varios compromisos para la agricultura y la seguridad alimentaria.

Actualmente, la ley cubana prohíbe a las empresas extranjeras poseer más de la mitad de un negocio o ser dueño de la tierra donde opera. Esta es una distinción importante que podría proteger contra la ‘financiarización’ y la mercantilización de la tierra agrícola, que en los Estados Unidos y otros países han contribuido a la acumulación de tierras agrícolas en manos de unos pocos y desincentivado la producción diversificada y sostenible. Sería importante que el usufructo y otras leyes continúen poniendo la tierra a disposición de los pequeños agricultores, a fin de proteger el movimiento agroecológico y descentralizar la acumulación de nueva riqueza.

Las oportunidades para la inversión extranjera directa están también favoreciendo a un sector turístico en expansión, con nuevas empresas mixtas de hoteles y centros de entretenimiento. Dado que estas empresas ofrecen una inyección de efectivo muy necesario a la economía cubana, también será importante equilibrar estos intereses nacionales con las preocupaciones ambientales y las necesidades locales para el uso de la tierra, cuando se toman las decisiones acerca del tamaño y ubicación.

#### **5.4 Investigación y Colaboración**

A pesar de los recientes reveses en el acercamiento entre Estados Unidos y Cuba, hay aún vías legales abiertas para la colaboración profesional, educativa e investigativa. Algunos de los autores estadounidenses de este artículo han encontrado que la oportunidad para diseminar los valores sociales y ecológicos de la economía moral intrínseca a las formas agroecológicas de producción en Cuba es particularmente poderosa e inspiradora. Las implicaciones de estos valores en la construcción de un sistema alimentario más sostenible y equitativo ya son evidentes en el progreso del sistema alimentario cubano en las últimas décadas. El potencial para que dichos beneficios se realicen en parte a través de las redes de solidaridad y los intercambios de conocimiento entre productores estadounidenses y cubanos podría ser sustancial. Por ejemplo, como lo muestra la relación de larga data entre la ANAP y la Federation of Southern Cooperatives (logísticamente facilitada por la Universidad de la Florida), el acercamiento puede beneficiar tanto a agricultores cubanos que buscan colaboradores para nuevas técnicas y variedades de semillas, como a agricultores estadounidenses que trabajan por enfrentar la marginalización económica en una economía dominada por el neoliberalismo y la financiarización. Otros grupos como Food First desde los 90 y CUSAN desde 2015, han jugado un papel clave en facilitar decenas de intercambios entre líderes de movimientos en ambos países para compartir conocimientos, establecer relaciones mutuamente beneficiosas alrededor de capacitaciones, investigaciones y educación, y amplificar las voces de agroecólogos cubanos afuera de Cuba.

El memorando de entendimiento firmado entre el Ministerio de Agricultura cubano y el Departamento de Agricultura estadounidense es un paso positivo hacia una mayor colaboración. Aunque la motivación declarada del secretario Vilsack es expandir las oportunidades de mercado de Estados Unidos, los acuerdos abren las puertas a una mayor colaboración directa entre investigadores, instituciones y los propios agricultores. Similarmente, se abren nuevas vías para que las universidades y otros institutos investigativos puedan trabajar en conjunto, cuando ONGs y universidades radicadas en Estados Unidos firmen memorandos de entendimiento con sus homólogos cubanos. Estos convenios estaban anteriormente limitados por la ley estadounidense que impedía que se compartiera el financiamiento de instituciones estadounidenses con instituciones estatales cubanas (incluyendo a las universidades públicas); pero cambios introducidos en las regulaciones de la OFAC bajo Obama en marzo de 2016, hacen que esto sea posible para el caso de la colaboración científica y el desarrollo agrícola, incluso cuando las advertencias de peligro al viajero hechas durante la presidencia de Trump han confundido a algunas universidades sobre la seguridad de enviar estudiantes e investigadores a Cuba para propósitos colaborativos y el cierre de los servicios consulares en la embajada de EEUU en La Habana dificulta que los profesionales cubanos asistan a encuentros en Estados Unidos.

Trabajar con investigadores y agricultores cubanos brinda a sus contrapartes norteamericanos la oportunidad de aprender más sobre los múltiples avances cubanos en el manejo y control biológico de plagas, pastos y forrajes, el uso de microorganismos benéficos y otras técnicas descritas en secciones anteriores de este artículo. Cuba también tiene una rica experiencia en metodologías sociales para compartir los conocimientos agroecológicos. En particular, los métodos de campesino a campesino en Cuba han creado redes de solidaridad y co-aprendizaje entre los agricultores, que han servido y pueden servir como modelos potenciales para los grupos de agricultores en Estados Unidos, incluyendo a la Federation of Southern Cooperatives, la Coalición Nacional de Agricultores Familiares, la Coalición Rural, la Southeastern African American Farmers' Organic Network, entre otros. Adicionalmente, las formas cubanas de cooperativismo sirven como interesantes estudios de caso para agricultores estadounidenses que buscan cada vez más formas de establecer una cooperación económica y de intercambio de saberes, ya que el sistema agroalimentario de los Estados Unidos hace difícil la supervivencia de agricultores familiares. Estas experiencias, así como las de desarrollo de infraestructura para agricultores urbanos, son de gran interés para los institutos agrícolas de las oficinas de extensión los Estados Unidos, las organizaciones sin fines de lucro y las asociaciones de agricultores.

Los Estados Unidos, por otro lado, tienen una amplia experiencia en el desarrollo y acceso a métodos para la distribución de productos agroecológicos cultivados localmente. Las experiencias con “food hubs” y Agricultura Apoyada por la Comunidad podría contribuir al creciente interés de Cuba en mercados alternativos a medida que los agricultores encuentran mayores oportunidades de vender sus productos en el mercado privado. Estados Unidos podría también colaborar con Cuba en el desarrollo de infraestructura para el procesamiento, transporte y almacenamiento en frío. En adición, ambos países enfrentan la necesidad de volverse resilientes al cambio climático y la colaboración mutua sería beneficiosa para ambos países.

## **6. Conclusiones**

Aunque el futuro del proceso de normalización de las relaciones entre Cuba y EEUU se mantiene incierto bajo el gobierno de Trump, los cambios iniciados por la administración de Obama han creado un impulso y la posibilidad de que las relaciones serán re-examinadas y desarrolladas en los años por venir. Un cambio en las relaciones entre los dos países produciría tanto oportunidades como riesgos para el sistema agroalimentario cubano, la soberanía alimentaria y los movimientos agroecológicos en ambos lados del estrecho, cuyo equilibrio tendrá que ser navegado por muchos actores e intereses en EEUU, Cuba y otros lugares. El sistema agroalimentario cubano está lejos de ser perfecto, pero el hecho de que la agroecología en Cuba ha logrado tanto con tan poco es un testimonio de su pueblo y del potencial desarrollado. Algunos de los ingredientes clave para expandir la agroecología a escala nacional existen en Cuba: acceso a la tierra (con sus propias limitantes), un sistema pedagógico en línea con los valores agroecológicos, programas académicos de agroecología, un proceso horizontal de aprendizaje y producción de conocimientos, ejemplos exitosos de fincas agroecológicas diversificadas e innovadoras, un sistema de agricultura urbana sin paralelo, un sector cooperativo sólido para la organización social y políticas públicas que comienzan a valorar la agroecología. Los factores que limitan la capacidad de las fincas agroecológicas de alimentar a la población de Cuba tienen menos que ver con los niveles de productividad de este tipo de agricultura y más que ver con una diversidad de otras barreras en la economía del sistema alimentario que incluyen: la falta de acceso a créditos e inversión para pequeñas mejoras infraestructurales como invernaderos, mallas, herramientas, paneles solares, equipos de excavación, biodigestores; falta de mercados para insumos básicos; falta de mercados diversos para la comercialización de sus productos; altas tasas de desperdicio de alimentos debido a sistemas ineficientes de distribución y ausencia de las instalaciones de procesamiento y almacenamiento necesarias; un sistema tributario que favorece la importación de alimentos; un complicado sistema de otorgamiento de licencias para la producción y comercialización; y una economía precaria en general con un sistema de doble moneda que lo distorsiona. Además de estas limitaciones, el sistema agroalimentario cubano enfrenta retos ambientales serios, incluyendo la erosión, la salinización, las especies invasoras y los eventos climáticos como sequías prolongadas, tormentas tropicales cada vez más severas y huracanes. Además, la isla enfrenta obstáculos demográficos en paralelo a su vecino norteamericano, los EEUU: una población rural envejecida (y en general) en medio de amplias tendencias de urbanización.

En última instancia, Cuba se enfrenta a cuestiones urgentes acerca de su nivel de compromiso con la agroecología y la soberanía alimentaria, el rol del campo en la sociedad y sus relaciones con el mundo más allá del malecón; y el pueblo cubano y sus líderes definirán la trayectoria de cambios en su sistema agroalimentario. En este artículo, hemos argumentado que, a medida que el acercamiento entre Cuba y Estados Unidos evoluciona, hay una oportunidad importante para apoyar la expansión sostenida de una agricultura sostenible basada en la agroecología, que es ecológicamente resiliente, económicamente equitativa y socialmente justa. El logro de este modelo en Cuba tendría ramificaciones de gran alcance, no solamente dentro del país, sino también para la comunidad internacional.

## Referencias

- Aguilar, Y., Calero, B., Rodríguez, D. y Muñiz, O., 2015. Cuba's polygon program—agricultural land rehabilitation. *Current Opinion in Environmental Sustainability*, 15, pp.72–78. DOI: <https://doi.org/10.1016/j.cosust.2015.09.003>.

- Ahmed, Azam. 2016. Cuba's surge in tourism keeps food off residents' plates. *The New York Times*, December 8.
- Altieri, M.A., 1995. *Agroecology: The Science of Sustainable Agriculture*. Boulder CO: Westview Press.
- Altieri, M.A., Funes-Monzote, F.R. y Petersen, P. 2011. Agroecologically efficient agricultural systems for smallholder farmers: contributions to food sovereignty. *Agronomy for Sustainable Development*, 32(1), pp.1–13. DOI: <https://doi.org/10.1007/s13593-011-0065-6>.
- Altieri, M.A. y Funes-Monzote, F.R., 2012. The Paradox of Cuban Agriculture. *Monthly Review: An Independent Socialist Magazine*, 63(8), pp.22–33. Disponible en: <https://monthlyreview.org/2012/01/01/the-paradox-of-cuban-agriculture/>. [Citado el 24 Octubre 2018].
- Altieri, M.A. y Toledo, V., 2011. The agroecological revolution in Latin America: rescuing nature, ensuring food sovereignty and empowering peasants. *The Journal of Peasant Studies*, 38(3), pp.587-612. DOI: <https://doi.org/10.1080/03066150.2011.582947>.
- Altieri, M.A. y Nicholls, C.I., 2012. Agroecology scaling up for food sovereignty and resiliency. En: E. Lichtfouse, ed. *Sustainable Agriculture Reviews*. Dordrecht: Springer. pp.1-29. DOI: [https://doi.org/10.1007/978-94-007-5449-2\\_1](https://doi.org/10.1007/978-94-007-5449-2_1).
- Altieri, M., Nicholls, C., Henao, A. y Lana, M., 2015. Agroecology and the design of climate change-resilient farming systems. *Agronomy for Sustainable Development*, 35(3), pp.869-890. DOI: <https://doi.org/10.1007/s13593-015-0285-2>.
- Álvarez, J., 2004. The issue of food security in Cuba. Disponible en: <https://edis.ifas.ufl.edu/pdffiles/FE/FE48300.pdf>. [Citado el 24 Octubre 2018].
- Álvarez, J. y Messina Jr., W.A., 1996. Cuba's new agricultural cooperatives and markets: antecedents, organization, and early performance and prospects. *Cuba in Transition*, 6, pp.175-195. Disponible en: <https://ascecuba.org/c/wp-content/uploads/2014/09/v06-28alvmess.fm.pdf>. [Citado el 24 Octubre 2018].
- Amin, S., 1976. *Unequal development: an essay on the social formations of peripheral capitalism*. Sussex, England: The Harvester Press.
- ANAP, 2015. La Agroecología en la ANAP Historia, Retos y Desafíos. *Revista ANAP: Órgano Nacional de la Asociación de Agricultores Pequeños*, 7.
- ANAP, 2016. *Metodología de Campesino a Campesino*. La Habana: ANAP, CITMA, OXFAM.
- Avery, D., 2009. The organic success was all a lie- a great, gaudy, Communist-style Big Lie. Canada Free Press. Disponible en: <https://canadafreepress.com/article/cubans-starve-on-diet-of-lies>. [Citado el 24 Octubre 2018].

- Béné, C., Wood, R.G., Newsham, A. y Davies, M., 2012. Resilience: new utopia or new tyranny? Reflection about the potentials and limits of the concept of resilience in relation to vulnerability reduction programmes. IDS Working Paper #405. Disponible en: <https://onlinelibrary.wiley.com/doi/epdf/10.1111/j.2040-0209.2012.00405.x>. [Citado el 24 Octubre 2018].
- Bouët, A., Bureau, J.C., Decreux, Y. and Jean, S., 2005. Multilateral agricultural trade liberalisation: The contrasting fortunes of developing countries in the Doha round. *World Economy*, 28(9), pp.1329-1354.
- Buchmann, C., 2009. Cuban Home Gardens and Their Role in Social–Ecological Resilience. *Human Ecology*, 37(6), pp.705-721. DOI: <https://doi.org/10.1007/s10745-009-9283-9>.
- Caballero-Grande, R., Casanova-Morales, A., Marrero-Teran, A., Hernández-Chávez, A. y Capote-Forte, J., 2000. La Asistencia Técnica a los Productores en Cuba: concepciones y evolución. *Cuadernos de Desarrollo Rural*, 45, pp.91-104. Disponible en: <http://revistas.javeriana.edu.co/index.php/desarrolloRural/article/view/2319>. [Citado el 24 Octubre 2018].
- Caballero-Grande, R., Hernández, A., Rodríguez, S., Perera, E., Blanco, J. y Contino, Y. 2016. *Reconversión Agroecológica Municipal, Camino a la Soberanía Alimentaria Local*. La Habana Cuba: ACTAF. Disponible en: <https://en.calameo.com/read/004840134ad3778bf4289>. [Citado el 24 Octubre 2018].
- Casimiro-Rodríguez, L., 2016. Necesidad de una transición agroecológica en Cuba, perspectivas y retos. *Pastos y Forrajes*, 39(3), pp.81-91.
- Casimiro Rodríguez, L., Casimiro González, J.A. y Suárez Hernández, J., 2017. *Resiliencia socioecológica de fincas familiares en Cuba*. Matanzas, Cuba: Estación Experimental de Pastos y Forrajes Indio Hatuey.
- Casimiro, L., 2017. Habla Casimiro: Entre ciclones, parte I.[online video] Disponible en: <https://www.youtube.com/watch?v=4uPavOhaWUc>. [Citado el 24 Octubre 2018].
- Caswell, M., Méndez, V.E., Hayden, J. , Anderzén, J., Merritt, P., Cruz, A., Izzo, V., Castro, S. y Fernández, M., 2016. Assessing Resilience in Coffee-Dependent Communities of Honduras, Nicaragua and Haití. Research Report. Agroecology and Rural Livelihoods Group (ARLG), University of Vermont: Burlington, VT. Disponible en: [https://www.uvm.edu/agroecology/wp-content/uploads/2017/03/ARLG-LWR\\_ResCoffeeCAHaiti\\_ResBrief\\_Final\\_Final\\_Mar17.pdf](https://www.uvm.edu/agroecology/wp-content/uploads/2017/03/ARLG-LWR_ResCoffeeCAHaiti_ResBrief_Final_Final_Mar17.pdf). [Citado el 24 Octubre 2018].

- Chappell, M.J. y LaValle, L.A., 2011. Food security and biodiversity: can we have both? An agroecological analysis. *Agriculture and Human Values*, 28(1), pp.3-26. DOI: <https://doi.org/10.1007/s10460-009-9251-4>.
- CITMA. 2017. *Enfrentamiento al cambio climático en la República de Cuba: Tarea vida*. La Habana: Ministerio de Ciencia, Tecnología y Medio Ambiente. Disponible en: <http://www.contraloria.gob.cu/documentos/noticias/FOLLETO%20TAREA%20VIDA.PDF>. [Citado el 24 Octubre 2018].
- Clausen, R., Clark, B. y Longo, S.B., 2015. Metabolic rifts and restoration: Agricultural crises and the potential of Cuba's organic, socialist approach to food production. *World Review of Political Economy*, 6(1), pp.4–32. DOI: <https://doi.org/10.13169/worlrevipoliecon.6.1.0004>
- Companioni, N., Rodríguez-Nodals, R. y Sardiñas, J., 2016. Capítulo 14: Agricultura urbana, suburbana y familiar. En: F. Funes Aguiar y L.V. Vázquez Moreno, eds., 2016. *Avances de la Agroecología en Cuba*. Matanzas, Cuba: Estación Experimental de Pastos y Forrajes Indio Hatuey. pp.233-246.
- Cubadebate, August 16th, 2017. Cuba modifica política para la entrega de tierras en usufructo. Disponible en: <http://www.cubadebate.cu/noticias/2017/08/16/cuba-modifica-politica-para-la-entrega-de-tierras-en-usufructo-video/#.WcoUs8hJaCo>. [Citado el 24 Octubre 2018].
- Dávalos-Fernández, R. 2012. *¿Embargo o Bloqueo?: La Instrumentación de un crimen contra Cuba*. La Habana: Editorial Capitán San Luis.
- Daviron, B. and Ponte, S., 2005. *The coffee paradox: Global markets, commodity trade and the elusive promise of development*. Zed books.
- Deere, C.M., Meurs, M. and Pérez, N., 1992. Toward a Periodization of the Cuban Collectivization Process: Changing Incentives and Peasant Response. *Cuban Studies* 22, pp. 115-149. Available through: JSTOR, [www.jstor.org/stable/24485743](http://www.jstor.org/stable/24485743). [Accessed 24 October 2018].
- Deere, C.D., 1997. Reforming Cuban Agriculture. *Development and Change*, 28(4), pp.649-669. DOI: <https://doi.org/10.1111/1467-7660.00059>.
- De Schutter, O., 2010. Report submitted by the Special Rapporteur on the Right to Food, Olivier De Schutter (Human Rights Council, 16th Session, Agenda item 3 No. A/HRC/16/49). United Nations General Assembly, Geneva. Disponible en: <https://www2.ohchr.org/english/issues/food/docs/a-hrc-16-49.pdf>. [Citado el 24 Octubre 2018].
- Edelman, M., 2014. Food sovereignty: Forgotten genealogies and future regulatory challenges. *Journal of Peasant Studies*, 41(6), pp.959-978. DOI: <https://doi.org/10.1080/03066150.2013.876998>.

- Einarsson, P., 2000. Agricultural trade policy as if food security and ecological sustainability mattered. Review and analysis of alternative proposals for the renegotiation of the WTO Agreement on Agriculture. *Global Studies*, (5).
- EngageCuba. 2016. Prospects for US Agribusiness in Cuba. Disponible en: <http://engagecuba.org/s/Prospects-for-US-Agribusiness-in-Cuba.pdf>. [Citado el 24 Octubre 2018].
- Enriquez, L. J., 2010. *Reactions to the Market: Small Farmers in the Economic Reshaping of Nicaragua, Cuba, Russia, and China*. University Park, Pennsylvania: The Pennsylvania State University Press.
- ETC, 2009. Who will feed us? Questions for the food and climate crises negotiators in Rome and Copenhagen. *Communique*, 102, pp.1-34. Disponible en: [http://www.etcgroup.org/files/ETC\\_Who\\_Will\\_Feed\\_Us.pdf](http://www.etcgroup.org/files/ETC_Who_Will_Feed_Us.pdf). [Citado el 24 Octubre 2018].
- FAO, 2013. FAO will cooperate with La Via Campesina, the largest movement of small-scale food producers in the world. October 4, 2013. Available at: [www.fao.org/news/story/en/item/201824/icode/](http://www.fao.org/news/story/en/item/201824/icode/). [Accessed 15 November 2018].
- FAO, 2015. International Symposium on Agroecology for Food Security and Nutrition. Disponible en: <http://www.fao.org/about/meetings/afns/en/>. [Citado el 24 Octubre 2018].
- FAO, IFAD, UNICEF, WFP and WHO, 2017. The State of Food Security and Nutrition in the World 2017. Building resilience for peace and food security. Rome: FAO. Disponible en: <http://www.fao.org/3/a-l7695e.pdf>. [Citado el 24 Octubre 2018].
- FAO, 2016. Food Security Data in Latin America and the Caribbean. Suite of Food Security Indicators. Disponible en: [http://fenixservices.fao.org/faostat/static/bulkdownloads/Food\\_Security\\_Data\\_E\\_Latin\\_America\\_and\\_the\\_Caribbean.zip](http://fenixservices.fao.org/faostat/static/bulkdownloads/Food_Security_Data_E_Latin_America_and_the_Caribbean.zip). [Citado el 24 Octubre 2018].
- Felipe Gonzalez, K. 2016. Cuba's dynamic tourist sector in 2016. *Granma*, December 14.
- Figuerola Albela, V.F., 2005. Los campesinos en el proyecto social cubano. *Temas*, 44, pp.13-25.
- Folke, C., Carpenter, S., Elmqvist, T., Gunderson, L., Holling, C.S. y Walker, B., 2002. Resilience and sustainable development: building adaptive capacity in a world of transformations. *Ambio* 31(5), pp.437-440. Disponible en: <http://citeseerx.ist.psu.edu/viewdoc/download?doi=10.1.1.629.3759&rep=rep1&type=pdf>. [Citado el 24 Octubre 2018].
- Francis, C., Lieblein, G., Gliessman, S., Breland, T. A., Creamer, N., Harwood, R., y Salomonsson, L., 2003. Agroecology : The Ecology of Food Systems. *Journal of Sustainable Agriculture*, 22(3), pp.99-118. DOI: [https://doi.org/10.1300/J064v22n03\\_10](https://doi.org/10.1300/J064v22n03_10).

- Frankenberger, T. R., Conostas, M. A., Nelson, S., and Starr, L., 2014. Nongovernmental organizations' approaches to resilience programming. Disponible en: <https://reliefweb.int/sites/reliefweb.int/files/resources/2020resilienceconfbr07.pdf>. [Citado el 24 Octubre 2018].
- Funes-Aguilar, F., 2001. El movimiento cubano de agricultura orgánica. En: F. Funes-Aguilar, L. García, M. Bourque, N. Pérez y P. Rosset, eds., 2001. *Transformando el Campo Cubano: Avances de la Agricultura Sostenible*. La Habana: ACTAF, Food First, CEAS.
- Funes-Monzote, F., 2008. *Farming like we're here to stay: The mixed farming alternative for Cuba*. Ph. D. Wageningen University.
- Funes-Monzote, F., 2009. Divergencia de enfoques entre agroecología y transgénicos. En: F. Funes-Monzote y E. Freyre, eds., 2009. *Transgénicos: ¿Qué se gana? ¿Qué se pierde? Textos para un debate en Cuba*. La Habana: Centro Félix Varela.
- Funes, F. y Vázquez, L., eds. 2016. *Avances de la agroecología en Cuba*. Matanzas, Cuba: Estación Experimental de Pastos y Forrajes Indio Hatuey.
- García-Álvarez, A. y González-Águila, R., 2016. Mercados agropecuarios en Cuba: evolución, análisis y mejora. *Economía y Desarrollo* 156(1), pp.200-218. Available at: <http://scielo.sld.cu/pdf/eyd/v156n1/eyd14116.pdf>. [Accessed 24 October 2018].
- García Álvarez, A. y Nova González, A. 2014. Food Production and Import Substitution in the Cuban Reform Process. En: C. Brundenius y R. Torres Pérez, eds., 2014. *No More Free Lunch: Reflections on the Cuban Economic Reform Process and Challenges for Transformation*. Switzerland: Springer.
- Giraldo, O.F. y Rosset, P.M., 2017. Agroecology as a territory in dispute: Between institutionality and social movements. *Journal of Peasant Studies*, 45(3), pp.545-564. DOI: <https://doi.org/10.1080/03066150.2017.1353496>.
- Gonzalez, C.G., 2006. Markets, monocultures, and malnutrition: agricultural trade policy through an environmental justice lens. *Mich. St. J. Int'l L.*, 14, p.345.
- Gonzalez, I., 2018. Four-year drought forces Cuba to find ways to build resilience. Inter Press News. September 8, 2018. Available at: <http://www.ipsnews.net/2018/09/four-year-drought-forces-cuba-find-ways-build-resilience/>. [Accessed 16 November 2018].
- Granma, 2007. Necesita economía cubana aumentar producción de alimentos. February 26, 2007. Available at: <http://www.granma.cu/granmad/2007/02/26/nacional/artic02.html>. [Citado el 24 Octubre 2018].

- Granma, 2017. National Defense Council Informational Report. Disponible en: <http://en.granma.cu/cuba/2017-09-29/national-defense-council-informational-report>. [Citado el 24 Octubre 2018].
- Granma, 2016. Declaración del Buró Nacional de la ANAP sobre medida del gobierno de EEUU. May 4, 2016. Disponible en: <http://www.granma.cu/cuba/2016-05-04/declaracion-del-buro-nacional-de-la-anap-sobre-medida-del-gobierno-de-eeuu-04-05-2016-22-05-15>. [Citado el 24 Octubre 2018].
- Greenpeace, 2015. Fostering economic resilience: The financial benefits of ecological farming in Kenya and Malawi. Johannesburg: Greenpeace Africa. Disponible en: <https://www.greenpeace.org/africa/Global/africa/graphics/FoodForLife/Fostering%20Economic%20Resilience.pdf>. [Citado el 24 Octubre 2018].
- Grogg, P., 2007. Cuba: Raul acknowledges day-to-day hardships. 26 July 2007. Disponible en: <http://www.ipsnews.net/2007/07/cuba-raul-castro-acknowledges-day-to-day-hardships/>. [Citado el 24 Octubre 2018].
- Henken, T. 2017. Entrepreneurial activity in Cuba's private sector. EngageCuba. Available at: <https://static1.squarespace.com/static/55806c54e4b0651373f7968a/t/58925edde4fcb53c9150a58a/1485987567626/Cuba+Entrepreneur+Fact+Sheet+%28Jan+2017%29.pdf>
- Hickel, J., 2016. The true extent of global poverty and hunger: questioning the good news narrative of the Millennium Development Goals. *Third World Quarterly*, 37(5), pp.749-767. DOI: <https://doi.org/10.1080/01436597.2015.1109439>.
- Hidalgo de los Santos, V. y Doimeadiós Reyes, Y., 2016. Sostenibilidad fiscal. Prioridad en la agenda de transformaciones del modelo económico cubano. *Investigación económica*, 75(298), pp.155-184. Disponible en: <http://www.redalyc.org/service/redalyc/downloadPdf/601/60148183005/6>. [Citado el 24 Octubre 2018].
- Holt-Giménez, E. y Altieri, M.A., 2013. Agroecology, Food Sovereignty and the New Green Revolution. *Agroecology and Sustainable Food Systems*, 37(1), pp.90-102. DOI: <https://doi.org/10.1080/10440046.2012.716388>
- Holt-Giménez, E. y Altieri, M.A., 2016. Agroecology "Lite": Cooptation and resistance in the Global North. *Food First*. Disponible en: <https://foodfirst.org/agroecology-lite-cooptation-and-resistance-in-the-global-north/>. [Citado el 24 Octubre 2018].
- Holt-Giménez, E., 2017. *A Foodie's Guide to Capitalism: Understanding the Political Economy of what We Eat*. New York: Monthly Review Press.
- Holt-Giménez, E., 2002. Measuring farmers' agroecological resistance after Hurricane Mitch in Nicaragua: a case study in participatory, sustainable land management impact

- monitoring. *Agriculture, Ecosystems & Environment*, 93(1-3), pp.87-105. DOI: [https://doi.org/10.1016/S0167-8809\(02\)00006-3](https://doi.org/10.1016/S0167-8809(02)00006-3)
- IAASTD (International Assessment of Agricultural Knowledge, Science, and Technology for Development), 2009. Synthesis report. A Synthesis of the Global and Sub-Global IAASTD Reports. Washington, DC: Island Press. Disponible en: <http://www.agassessment-watch.org/report/Synthesis%20Report%20%28English%29.pdf>. [Citado el 24 Octubre 2018].
- INIFAT, 2016. *Programas de Agricultura Urbana, Suburbana y familiar en Cuba*. 3rd ed. La Habana: Ministerio de Agricultura Cubana.
- IPCC, 2014. Climate change 2014: synthesis report. Contribution of Working Groups I, II and III to the fifth assessment report of the Intergovernmental Panel on Climate Change. IPCC. Disponible en: [https://www.ipcc.ch/pdf/assessment-report/ar5/syr/SYR\\_AR5\\_FINAL\\_full.pdf](https://www.ipcc.ch/pdf/assessment-report/ar5/syr/SYR_AR5_FINAL_full.pdf). [Citado el 24 Octubre 2018].
- IPES-Food, 2015. The New Science of Sustainable Food Systems: Overcoming Barriers to Food Systems Reform. Disponible en: [http://www.ipes-food.org/images/Reports/IPES\\_report01\\_1505\\_web\\_br\\_pages.pdf](http://www.ipes-food.org/images/Reports/IPES_report01_1505_web_br_pages.pdf). [Citado el 24 Octubre 2018].
- IPES-Food, 2016. From uniformity to diversity: a paradigm shift from industrial agriculture to diversified agroecological systems. International Panel of Experts on Sustainable Food systems. Disponible en: [http://www.ipes-food.org/images/Reports/UniformityToDiversity\\_FullReport.pdf](http://www.ipes-food.org/images/Reports/UniformityToDiversity_FullReport.pdf). [Citado el 24 Octubre 2018].
- Kilcher, L., 2009. Organic Agriculture in Cuba: Managing with limited resources. In: H. Willer, and L. Kilcher, eds., 2010. The World of Organic Agriculture, Statistics and Emerging Trends 2010. IFOAM, Bonn, and FiBL, Frick. Disponible en: <http://orgprints.org/17925/1/kilcher-2009-world-organic-agriculture.pdf>. [Citado el 24 Octubre 2018].
- Koohafkan, P., Altieri, M.A. y Holt-Giménez, E., 2012. Green Agriculture: foundations for biodiverse, resilient and productive agricultural systems. *International Journal of Agricultural Sustainability*, 10(1), pp.61-75. DOI: <https://doi.org/10.1080/14735903.2011.610206>.
- La Via Campesina, 2011. Organisation: The International Peasant's Voice. February 9. Available at: <http://viacampesina.org/en/index.php/organisation-mainmenu-44>.
- Lappé, F.M., Collins, J. y Rosset, P., 1998. *World Hunger: 12 Myths*. 2<sup>nd</sup> ed. New York: Grove Press.
- Leslie, I.S., 2017. Improving farmers markets and challenging neoliberalism in Argentina. *Agriculture and Human Values*, 34(3), pp.729-742. DOI: <https://doi.org/10.1007/s10460-017-9774-z>

- Maxwell, S., 1996. Food security: a post-modern perspective. *Food Policy*, 21(2), pp.155-170. DOI: [https://doi.org/10.1016/0306-9192\(95\)00074-7](https://doi.org/10.1016/0306-9192(95)00074-7)
- Machín-Sosa, B., Roque-Jaime, A., Ávila-Lozano, D.R. y Rosset, P., 2010. Revolución Agroecológica: el Movimiento de Campesino a Campesino de la ANAP en Cuba. La Habana: ANAP. Disponible en: <http://www.rebelion.org/docs/111067.pdf>. [Citado el 24 Octubre 2018].
- McCune, N., Rosset, P.M., Salazar, T.C., Saldivar Moreno, A. y Morales, H., 2017. Mediated territoriality: rural workers and the efforts to scale out agroecology in Nicaragua. *The Journal of Peasant Studies*, 44(2), pp.354-376. DOI: <https://doi.org/10.1080/03066150.2016.1233868>.
- McMichael, P., 2009. A food regime genealogy. *The Journal of Peasant Studies*, 36(1), pp.139-169. DOI: <https://doi.org/10.1080/03066150902820354>.
- Méndez, V.E., Bacon, C.M. y Cohen, R. and Gliessman, S.R., eds. 2015. *Agroecology: A transdisciplinary, participatory and action-orientated approach*. Boca Ratón, Florida: CRC Press.
- Mesa-Lago, C., 1998. Assessing Economic and Social Performance in the Cuban Transition of the 1990s. *World Development*, 26(5), pp.857-876. DOI: [https://doi.org/10.1016/S0305-750X\(98\)00020-5](https://doi.org/10.1016/S0305-750X(98)00020-5).
- Mier y Terán Giménez Cacho, M., Giraldo, O.F., Aldasoro, M., Morales, H., Ferguson, B.G., Rosset, P., Khadse, A. y Campos, C., 2018. Bringing agroecology to scale: key drivers and emblematic cases. *Agroecology and Sustainable Food Systems*, 42(6), pp.637-665. DOI: <https://doi.org/10.1080/21683565.2018.1443313>
- Miller, K., 2017. Catepillar, John Deere Among First US Companies to Deal with Cuba. *American Ag Radio Network*. Disponible en: <http://americanagnetwork.com/2017/11/u-s-manufactured-farm-equipment-way-cuba/>. [Citado el 24 Octubre 2018].
- MINAG, 2015. *Propuesta de Política para el Programa de Autoabastecimiento Alimentario Municipal*. La Habana: MINAG.
- MINCEX, 2016. *Cuba: Portfolio of Opportunities for Foreign Investment 2016-2017*. La Habana: MINCEX. Disponible en: [https://arwtc.org/wp-content/uploads/2017/05/Portfolio\\_Opportunities\\_Foreign\\_Investment\\_2016-2017.pdf](https://arwtc.org/wp-content/uploads/2017/05/Portfolio_Opportunities_Foreign_Investment_2016-2017.pdf). [Citado el 24 Octubre 2018].
- Monzote, M., Muñoz, E. y Funes-Monzote, F., 2001. Integración Ganadera - Agricultura. En: F. Funes, L. García, M. Bourque, N. Pérez y P. Rosset, eds., 2001. *Transformando el Campo Cubano: Avances de la Agricultura Sostenible*. La Habana: ACTAF. pp.235-257.
- Morales, E., 2017. The Nestlé Niche: The Swiss multinational's secret to thriving in Cuba. *Cuba Trade Magazine*. Disponible en: <http://www.cubatrademagazine.com/nestle-niche-secret-thriving-cuba/>. [Citado el 24 Octubre 2018].

- Moyo, S, Praveen, J. y Yeros, P. 2013. The Classical Agrarian Question: Myth, Reality and Relevance Today. *Journal of Political Ecology*, 2(1), pp. 93-119. DOI: <https://doi.org/10.1177/2277976013477224>.
- Nova González, A., 2012. Cuban agriculture and the current economic transformation process. From the Island Cuba Study Group, (9). Disponible en: [http://www.cubastudygroup.org/index.cfm/files/serve?File\\_id=4281a88b-6435-4f68-bb70-ab5a5d65a3c1](http://www.cubastudygroup.org/index.cfm/files/serve?File_id=4281a88b-6435-4f68-bb70-ab5a5d65a3c1). 2017. The Nestlé Niche: The Swiss multinational's secret to thriving in Cuba. Cuba Trade Magazine. Available at: <http://www.cubatrademagazine.com/nestle-niche-secret-thriving-cuba/>. [Citado el 24 Octubre 2018].
- Nova González, A., 1994. *La Reorganización de la Agricultura en Cuba - Factor Clave de la Estabilización Económica*. La Habana: Instituto Nacional de Investigaciones Económicas (INIE).
- Nova González, A. y Figueroa Alfonso, G., 2018. Recent transformations in Cuban agricultural policy and impacts on markets and production. *Elem Sci Anth*, X(X): XX. DOI: <https://doi.org/10.1525/elementa.323>
- Nova González, A., 2016. Economía de la transición Agroecológica. En: F. Funes Aguilar y L.V. Vázquez Moreno, eds., 2016. *Avances de la Agroecología en Cuba*. Matanzas, Cuba: Estación Experimental de Pastos y Forrajes Indio Hatuey. pp. 47-56.
- Nyeléni, 2007. Nyéléni 2007 Forum for Food Sovereignty. Sélingué-Mali. Disponible en: [https://nyeleni.org/DOWNLOADS/Nyelni\\_EN.pdf](https://nyeleni.org/DOWNLOADS/Nyelni_EN.pdf). [Citado el 24 Octubre 2018].
- Nyeléni, 2015. Declaration of the International Forum for Agroecology. Sélingué-Mali. Disponible en: [www.foodsovereignty.org/.../Download-declaration-Agroecology-Nyeleni-2015.pdf](http://www.foodsovereignty.org/.../Download-declaration-Agroecology-Nyeleni-2015.pdf). [Citado el 24 Octubre 2018].
- OnCuba, 2017. Cuba pierde 57 por ciento de los alimentos que produce. OnCuba Magazine. Disponible en: <http://oncubamagazine.com/economia-negocios/rendimiento-de-agricultura-cubana-entre-los-mas-bajos-del-continente/>. [Citado el 24 Octubre 2018].
- ONEI, 2017a. *Panorama Uso de la Tierra*. La Habana: ONEI.
- ONEI, 2017b. *Anuario Estadístico de Cuba 2016: Agricultura, Ganadería, Silvicultura y Pesca*. La Habana: ONEI.
- Parmentier, S., 2014. Scaling up agroecological approaches: what, why and how?. Discussion paper. Oxfam Solidarité. Disponible en: [http://www.fao.org/fileadmin/templates/agphome/scpi/Agroecology/Agroecology\\_Scaling-up\\_agroecology\\_what\\_why\\_and\\_how\\_-OxfamSol-FINAL.pdf](http://www.fao.org/fileadmin/templates/agphome/scpi/Agroecology/Agroecology_Scaling-up_agroecology_what_why_and_how_-OxfamSol-FINAL.pdf). [Citado el 24 Octubre 2018].
- Patel, R., 2009. Food sovereignty. *The Journal of Peasant Studies*, 36(3), pp.663-706.

- PCC (Partido Comunista de Cuba), 2011. Lineamientos de la Política Económica y Social del Partido y la Revolución para el periodo 2011-2016. La Habana: PCC.
- PCC, 2017. Lineamientos de la Política Económica y Social del Partido y la Revolución para el periodo 2016-2021. La Habana: PCC.
- Perfecto, I., Vandemeer, J. y Wright, A., 2009. *Nature's Matrix: Linking Agriculture, Conservation and Food Sovereignty*. London and Sterling, VA: Earthscan.
- Piconne, T., 2018. U.S.-Cuban relations are about to get worse. Brookings Institute. Available at <https://www.brookings.edu/blog/order-from-chaos/2018/04/16/u-s-cuban-relations-are-about-to-get-worse/>. [Accessed 16 November 2018].
- Pimbert, M.P., 2008. *Towards food sovereignty: reclaiming autonomous food systems*. International institute for environment and development (IIED).
- Pimbert, M.P., Thompson, J., Vorley, W.T., Fox, T. y Tacoli, C., 2001. Global restructuring, agri-food systems and livelihoods. *Gatekeeper Series* No.100. International Institute for Environment and Development (IIED). Disponible en: <http://pubs.iied.org/pdfs/9166IIED.pdf>. [Citado el 24 Octubre 2018].
- Rodríguez, J.L., 1987. Agricultural Policy and Development in Cuba. *World Development* 15(1), pp. 23-39. DOI: [https://doi.org/10.1016/0305-750X\(87\)90100-8](https://doi.org/10.1016/0305-750X(87)90100-8).
- Rodríguez-Nodals, A.A., Companioni-Concepción, N. y Gonzáles-Bayón, R., 2006. La agricultura urbana y periurbana en Cuba: Un ejemplo de agricultura sostenible. ACTAF, *VI Encuentro de Agricultura Orgánica*. La Habana, 9-12 November 2006.
- Rosset, P.M., Machín Sosa, B., Roque Jaime, A.M. y Ávila Lozano, D.R., 2011. The Campesino-to-Campesino agroecology movement of ANAP in Cuba: social process methodology in the construction of sustainable peasant agriculture and food sovereignty. *Journal of Peasant Studies*, 38(1), pp.161–191. DOI: <https://doi.org/10.1080/03066150.2010.538584>.
- Rosset, P.M. y Altieri, M.A., 2017. *Agroecology: science and politics*. Rugby, UK: Practical Action Publishing.
- Sen, A., 1984. Rights and Capabilities. En: A. Sen, ed. 1984. *Resources, Values and Development*. Oxford: Basil Blackwell.
- Simon-Reardon, J.A. y Alemán-Pérez, R., 2010. Agroecology and the Development of Indicators of Food Sovereignty in Cuban Food Systems Agroecology and the Development. *Journal of Sustainable Agriculture*, 34(8): 907-922. DOI: <https://doi.org/10.1080/10440046.2010.519205>.

- Socorro, M. y Sánchez, S. 2016. Producción de arroz con bajos insumos. En: Avances de la Agroecología en Cuba. Eds: F. Funes y L. Vázquez. Editora Est. Exp. Indio Hatuey. Matanzas, Cuba: 263-278.
- Spoor, M. y Thiemann, L. 2016. "Who Will Feed Cuba"? Agrarian Transformation, Peasants and Food Production. International Institute of Social Studies (ISS), Global governance/politics, climate justice & agrarian/social justice: linkages and challenges. An international colloquium. The Hague, Netherlands, 4-5 February 2016. Disponible en: [https://www.iss.nl/sites/corporate/files/26-ICAS\\_CP\\_Spoor\\_and\\_Thiemann.pdf](https://www.iss.nl/sites/corporate/files/26-ICAS_CP_Spoor_and_Thiemann.pdf). [Citado el 24 Octubre 2018].
- Toledo, V. y Barrera-Bassols, N., 2017. Political Agroecology in Mexico: A Path Towards Sustainability. *Sustainability*, 9(2), pp.268. DOI: <https://doi.org/10.3390/su9020268>.
- USDA FAS, 2015. US Agricultural Exports to Cuba Have Substantial Room for Growth. US Department of Agriculture Foreign Agricultural Service. Disponible en: <https://www.fas.usda.gov/data/us-agricultural-exports-cuba-have-substantial-room-growth>. [Citado el 24 Octubre 2018].
- USDA and MINAG. 2016. Memorandum of understanding between United States department of agriculture and the republic of Cuba ministry of agriculture on cooperation in agriculture and related fields. March 21. Available at: [https://www.fas.usda.gov/sites/default/files/2016-06/u.s.-cuba\\_agricultural\\_mou\\_signed.pdf](https://www.fas.usda.gov/sites/default/files/2016-06/u.s.-cuba_agricultural_mou_signed.pdf)
- USDA and MINAG. 2017. Memorandum of understanding for cooperation between the animal and plant health inspection service of the department of agriculture of the United States of America and the animal and plant health directorates of the ministry of agriculture of the Republic of Cuba." January 19. Available at: [https://www.fas.usda.gov/sites/default/files/2017-02/signed\\_animal\\_plant\\_health\\_mou\\_english\\_spanish\\_01\\_2017.pdf](https://www.fas.usda.gov/sites/default/files/2017-02/signed_animal_plant_health_mou_english_spanish_01_2017.pdf)
- Varghese, S. y Hansen-Huhn, K., 2013. Scaling up agroecology: towards the realization of the right to food. Institute for Agriculture and Trade Policy. Disponible en: [https://www.iatp.org/sites/default/files/2013\\_10\\_09\\_ScalingUpAgroecology\\_SV\\_0.pdf](https://www.iatp.org/sites/default/files/2013_10_09_ScalingUpAgroecology_SV_0.pdf). [Citado el 24 Octubre 2018].
- Vázquez, L., Aymerich, Y., Díaz, A., Peña, A., Cobas, R., Álvarez, E., Rodríguez, L., García, C.L., Gómez, J.A., Peña, Y., Constante, E., Savón, Y., Wilson, D., Fonseca, N., Pérez, J.M., Fernández, C., Hernández, R. y Rodríguez, M., 2016. Resiliencia a sequía sobre bases agroecológicas. Sistematización de un proceso de co-innovación participativa. Provincia de Guantánamo, Cuba. Ed. OXFAM, Gobierno Belga, CITMA, ANAP. Guantánamo.
- Vilsack, T. 2016. Agriculture Secretary Vilsack announces historic agreements for U.S.-Cuba agriculture sectors. USDA Press Release. March 21. Available at: <https://www.usda.gov/media/press-releases/2016/03/21/agriculture-secretary-vilsack-announces-historic-agreements-us-cuba>

- Vinik, D., 2017. The strange story of the first Cuban import in half a century. Could Trump's new policy put a fragile opening at risk? *The Agenda, Politico*. Disponible en: <https://www.politico.com/agenda/story/2017/06/16/strange-story-cuban-import-charcoal-000461>. [Citado el 24 Octubre 2018].
- Ward, M. 2016. Missouri rice lands in Cuba port. *Missouri Ruralist*, May 26.
- Wezel, A., Bellon, S., Dore, T., Francis, C., Vallod, D. y David, C., 2009. Agroecology as a science, a movement and a practice. A review. *Agronomy for Sustainable Development*, 29(4), pp.503-515. DOI: <https://doi.org/10.1051/agro/2009004>.
- Whitefield, M., 2016. Cuba says no to Obama-promoted plans to assemble small tractors on the island. *Miami Herald*. Disponible en: <http://www.miamiherald.com/news/nation-world/world/americas/cuba/article112522157.html>. [Citado el 24 Octubre 2018].
- Wittman, H., 2011. Food sovereignty: a new rights framework for food and nature?. *Environment and Society*, 2(1), pp.87-105.
- Wijeratna, A., 2018. Agroecology: Scaling up, scaling out. Action Aid. April 2018. Disponible en: [http://www.actionaid.org/sites/files/actionaid/agroecology\\_def\\_web.pdf](http://www.actionaid.org/sites/files/actionaid/agroecology_def_web.pdf). [Citado el 24 Octubre 2018].
- Williams, J. M., (2017). *Otros Caminos: Making an Alternative Agriculture Movement in Everyday Cuba*. Ph. D. The University of North Carolina.
- Wise, T.A., 2009a. *Agricultural dumping under NAFTA: Estimating the costs of US agricultural policies to Mexican producers*. Tufts University.
- Wise, T.A., 2009b. Promise or pitfall? The limited gains from agricultural trade liberalisation for developing countries. *The Journal of Peasant Studies*, 36(4), pp.855-870.
- Wittman, H., Desmarais, A.A. y Wiebe, N., 2010. The origins and potential of food sovereignty. In: H. Wittman, AA, Desmarais and N. Wiebe, eds., 2010. *Food Sovereignty: Reconnecting Food, Nature and Community*. Halifax and Winnipeg: Fernwood Publishing. pp.1-14.
- Wright, J., 2009. *Sustainable Agriculture and Food Security in an Era of Oil Scarcity. Lessons from Cuba*. London and Sterling, VA: Earthscan.
- Wright, J., 2012. The little-studied success story of post-crisis food security in Cuba: does lack of international interest signify lack of political will? *International Journal of Cuban Studies*, 4(2), pp.130-153. DOI: <https://www.jstor.org/stable/41945973>.

**Contribuciones**

Contribuyo a la concepción y diseño: MF, JW, MM, GF, GGL

Contribuyo a la adquisición de datos: MF, JW, GF, MM, LV, NP, GGL, GR, LC

Contribuyo al análisis e interpretación de datos: MF, JW, GF, MM, LV, NP, GGL, GR, LC

Redactó y/o revisó el artículo: MF, JW, GF, MM, LV, NP, GGL, LC, FFA

Aprobó la versión actual para publicación: MF, JW, GF, MM, LV, NP, GGL, LC, FFA

**Agradecimientos**

Los autores quisieran agradecer Roberto Caballero Grande y Fernando Funes Monzote por sus comentarios en versiones previas de este artículo. Elementa quisiera agradecer a Nils McCune y Galia Figueroa por la traducción de inglés a español.

**Información sobre la financiación**

Este trabajo fue en parte apoyado por La Red de Agroecología Cuba-EE.UU., que recibe financiación de la Fundación Ford, la Fundación Flora Family y la Fundación Christopher Reynolds.

**Conflicto de intereses**

Los autores declaran que no existe ningún conflicto de intereses.
